# Supplementary material for: The architecture and stabilisation of flagellotropic tailed bacteriophages
Source: PubMed Central journal article supplement (PMC7385642; doi:10.1038/s41467-020-17505-w), 2020-07-27
Supplement: 41467_2020_17505_MOESM1_ESM.pdf [file 41467_2020_17505_MOESM1_ESM.pdf]

# The architecture and stabilisation of flagellotropic tailed bacteriophages

Joshua M. Hardy<sup>1,+</sup>, Rhys A. Dunstan<sup>2,+</sup>, Rhys Grinter<sup>2</sup>, Matthew J. Belousoff<sup>2</sup>, Jiawei Wang<sup>2</sup>, Derek Pickard<sup>3,4</sup>, Hariprasad Venugopal<sup>5</sup>, Gordon Dougan<sup>3,4</sup>, Trevor Lithgow<sup>2,\*</sup> & Fasséli Coulibaly<sup>1,\*</sup>

1. Infection & Immunity Program, Biomedicine Discovery Institute & Department of Biochemistry and Molecular Biology, Monash University, Clayton, VIC, Australia
2. Infection & Immunity Program, Biomedicine Discovery Institute & Department of Microbiology, Monash University, Clayton, VIC, Australia
3. Wellcome Trust Sanger Institute, Hinxton, Cambridge, CB10 1SA, United Kingdom
4. Department of Medicine, University of Cambridge, Addenbrooke's Hospital, Hills Road, Cambridge, UK.
5. Ramaciotti Centre for Cryo-Electron Microscopy, Monash University, Clayton, VIC, Australia

+ These authors contributed equally to the work

\* To whom correspondence should be addressed: [trevor.lithgow@monash.edu](mailto:trevor.lithgow@monash.edu),  
[fasseli.coulibaly@monash.edu](mailto:fasseli.coulibaly@monash.edu)

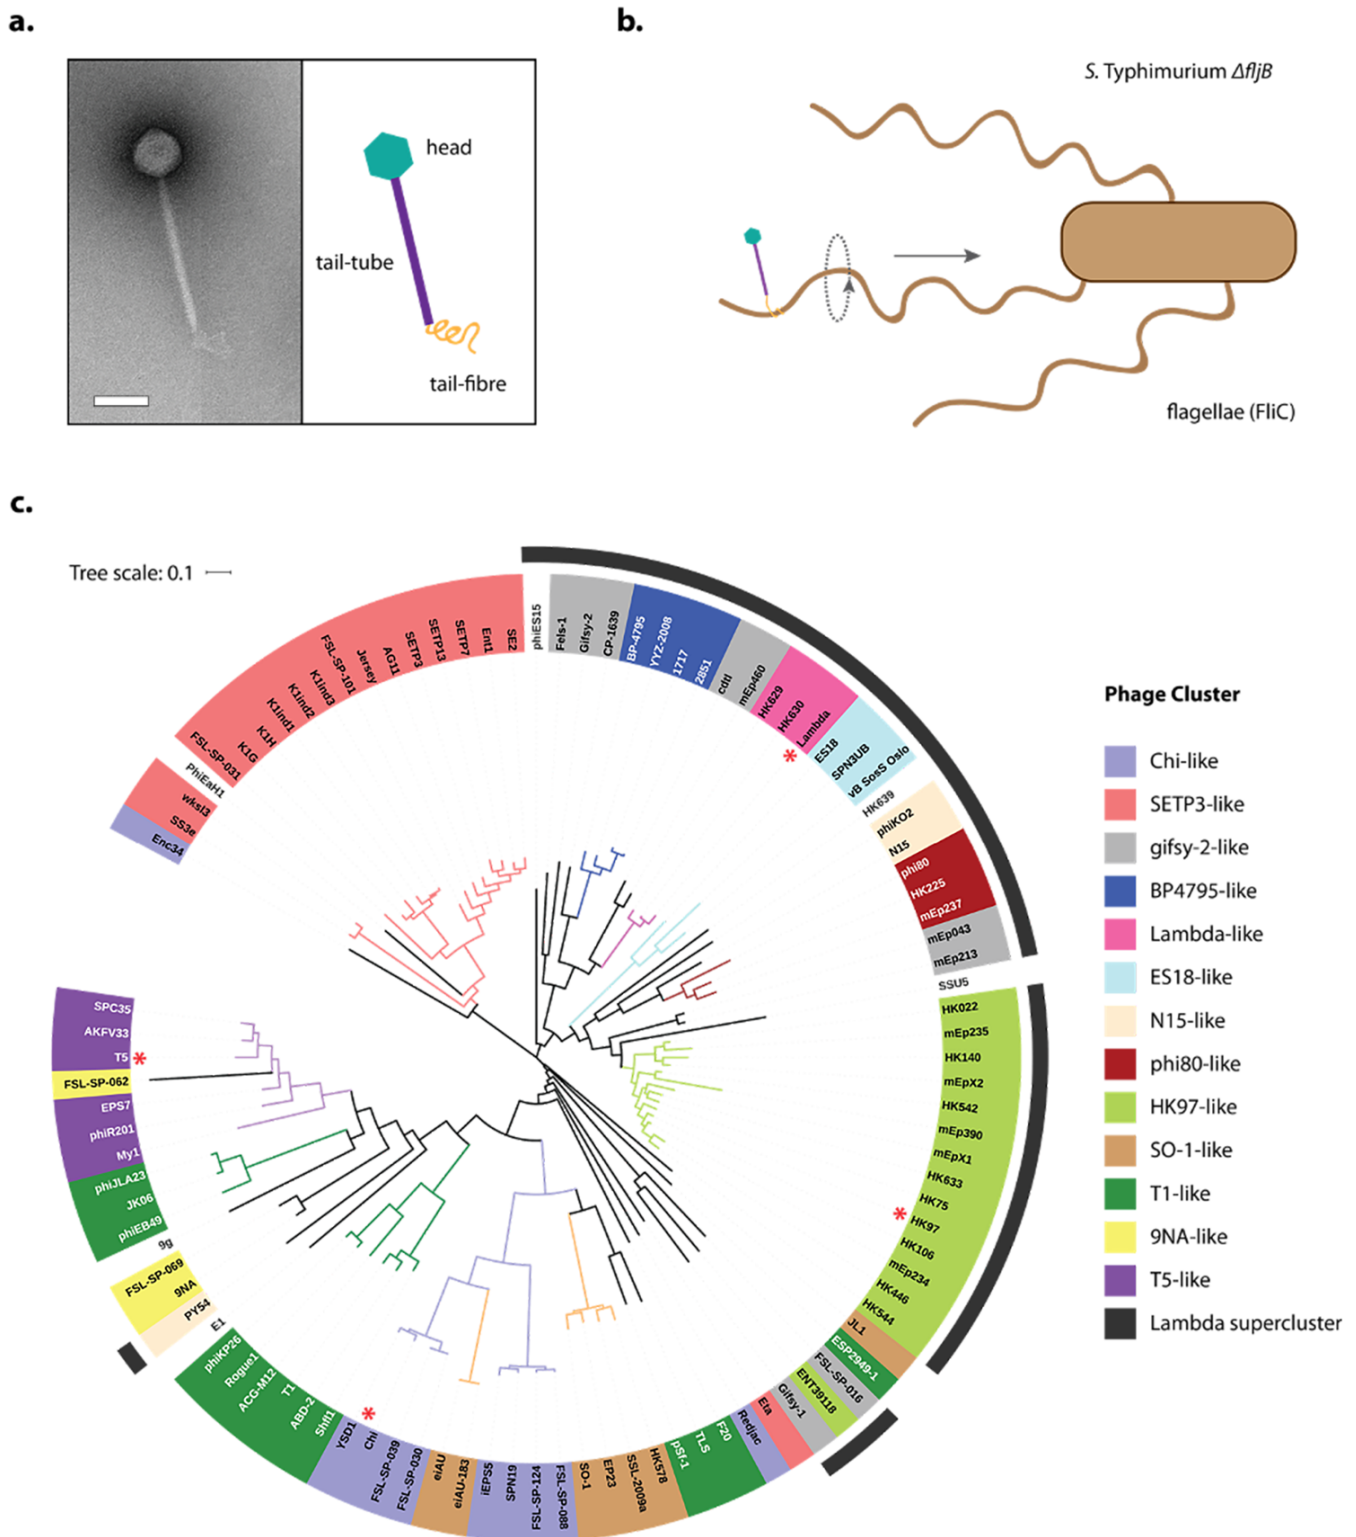

**Supplementary Figure 1. Flagellotropic phage engage with host bacterial flagella in order to initiate infection.** **a.** Negative stain image of a YSD1 particle (five imaging sessions), and cartoon representation of the same particle, indicating capsid, tail-tube and long tail-fibre. The scale bar represents 70 nm **b.** Salmonella have several flagella types, in *S. Typhimurium* ( $\Delta fljB$ ) all flagella are polymerized from FliC subunits, which are permissive for YSD1 binding. Interaction of the phage with the rotating flagella provides the basis for phage locomotion along the flagellum towards the Salmonella cell body, by a nut-on-bolt model of locomotion<sup>1,2</sup>. **c.** Tree based on the complete genome alignment of a highly-curated phage genome collection<sup>3</sup> (Supplementary Table 9). The color-coded text indicates the cluster nomenclature used by Grose and Casjens<sup>3</sup>, including the archetypal phage for each cluster. The same cluster-specific coloring is used for the branches of the tree. YSD1 belongs to the  $\chi$ -like group, which are highlighted in mauve. The red asterisks denote Chi and, because they are 97% sequence identical, YSD1, as well other viruses mentioned in the text.

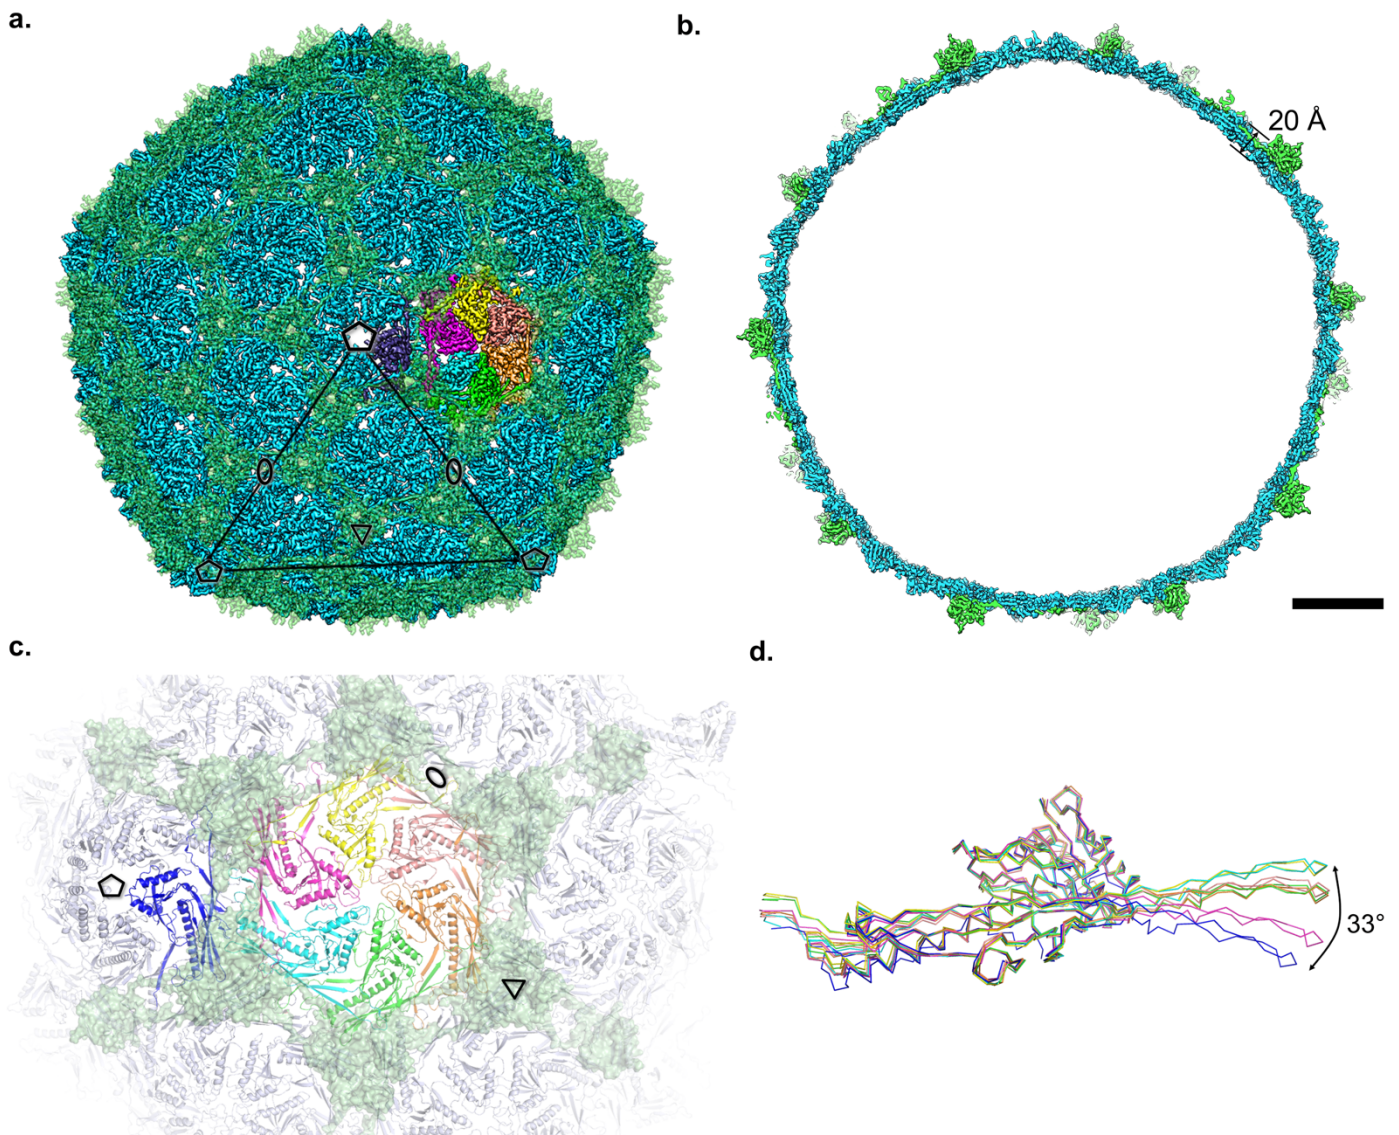

**Supplementary Figure 2. The T=7 icosahedral YSD1 capsid.** **a.** Surface representation of the MCP of YSD1 (blue) and auxiliary protein (green) with the icosahedral symmetry axes indicated. YSD1 has a T=7 laevo symmetry with six subunits forming a pseudo 6-fold symmetry axis and one pentameric subunit (dark blue) at the icosahedral 5-fold symmetry axis. **b.** Cross-sectional view of capsid with the average thickness measurement. Scale bar = 100 Å. **c.** Zoom of panel a on a cartoon depiction of the asymmetric unit of the MCP. The auxiliary protein is shown as a semi-transparent surface (pale green). **d.** Alignment of the chains from the asymmetric unit in PyMOL reveals the quasi-equivalent conformations of each subunit. E-loops that display the most pronounced bend are located at (blue) and around (magenta) the 5-fold vertex. Colours correspond to panel a and b.

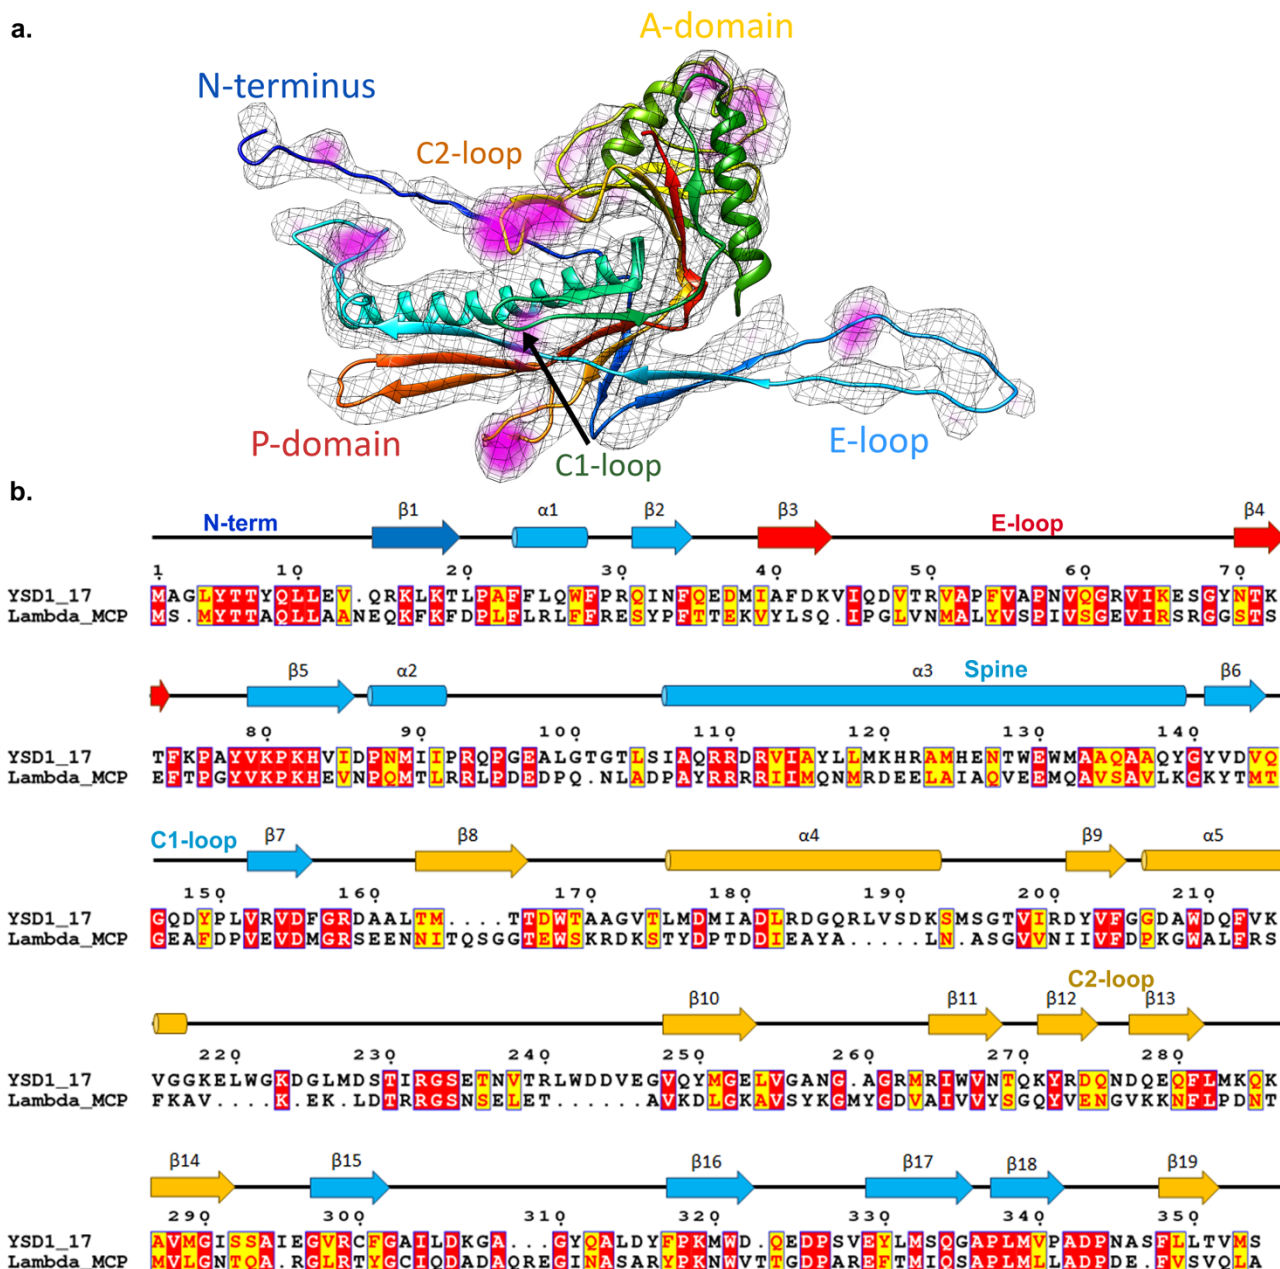

**Supplementary Figure 3. The MCP of  $\chi$ -like and  $\lambda$  phages are closely related and characterized by a clamp of loops C1 and C2. a.** The MCP of YSD1 is depicted in a rainbow representation and annotated with structural features. A real-space fit of the MCP within the 6.8 Å cryo-EM reconstruction of  $\lambda$  phage capsid (EMD-5012, grey mesh) using Chimera<sup>4</sup> reveals a high level of similarity. The YSD1 MCP accounts for approximately 88 residues that HK97 gp5 (PDB:2FT1) does not account for (magenta). The A-domain of HK97 was fitted independently to the rest of HK97. **b.** Structure-based sequence alignment of the MCP of YSD1 and lambda. Beta-strands are displayed as arrows and alpha-helices as tubes. Secondary structure elements are colored by domain: N-terminus (blue), P-domain (cyan), E-loop (red), and A-domain (yellow). Sequence alignment was performed using T-COFFEE<sup>5</sup> and displayed using ESPRIPT<sup>6</sup>. Identical and similar residues are highlighted in red and yellow respectively.

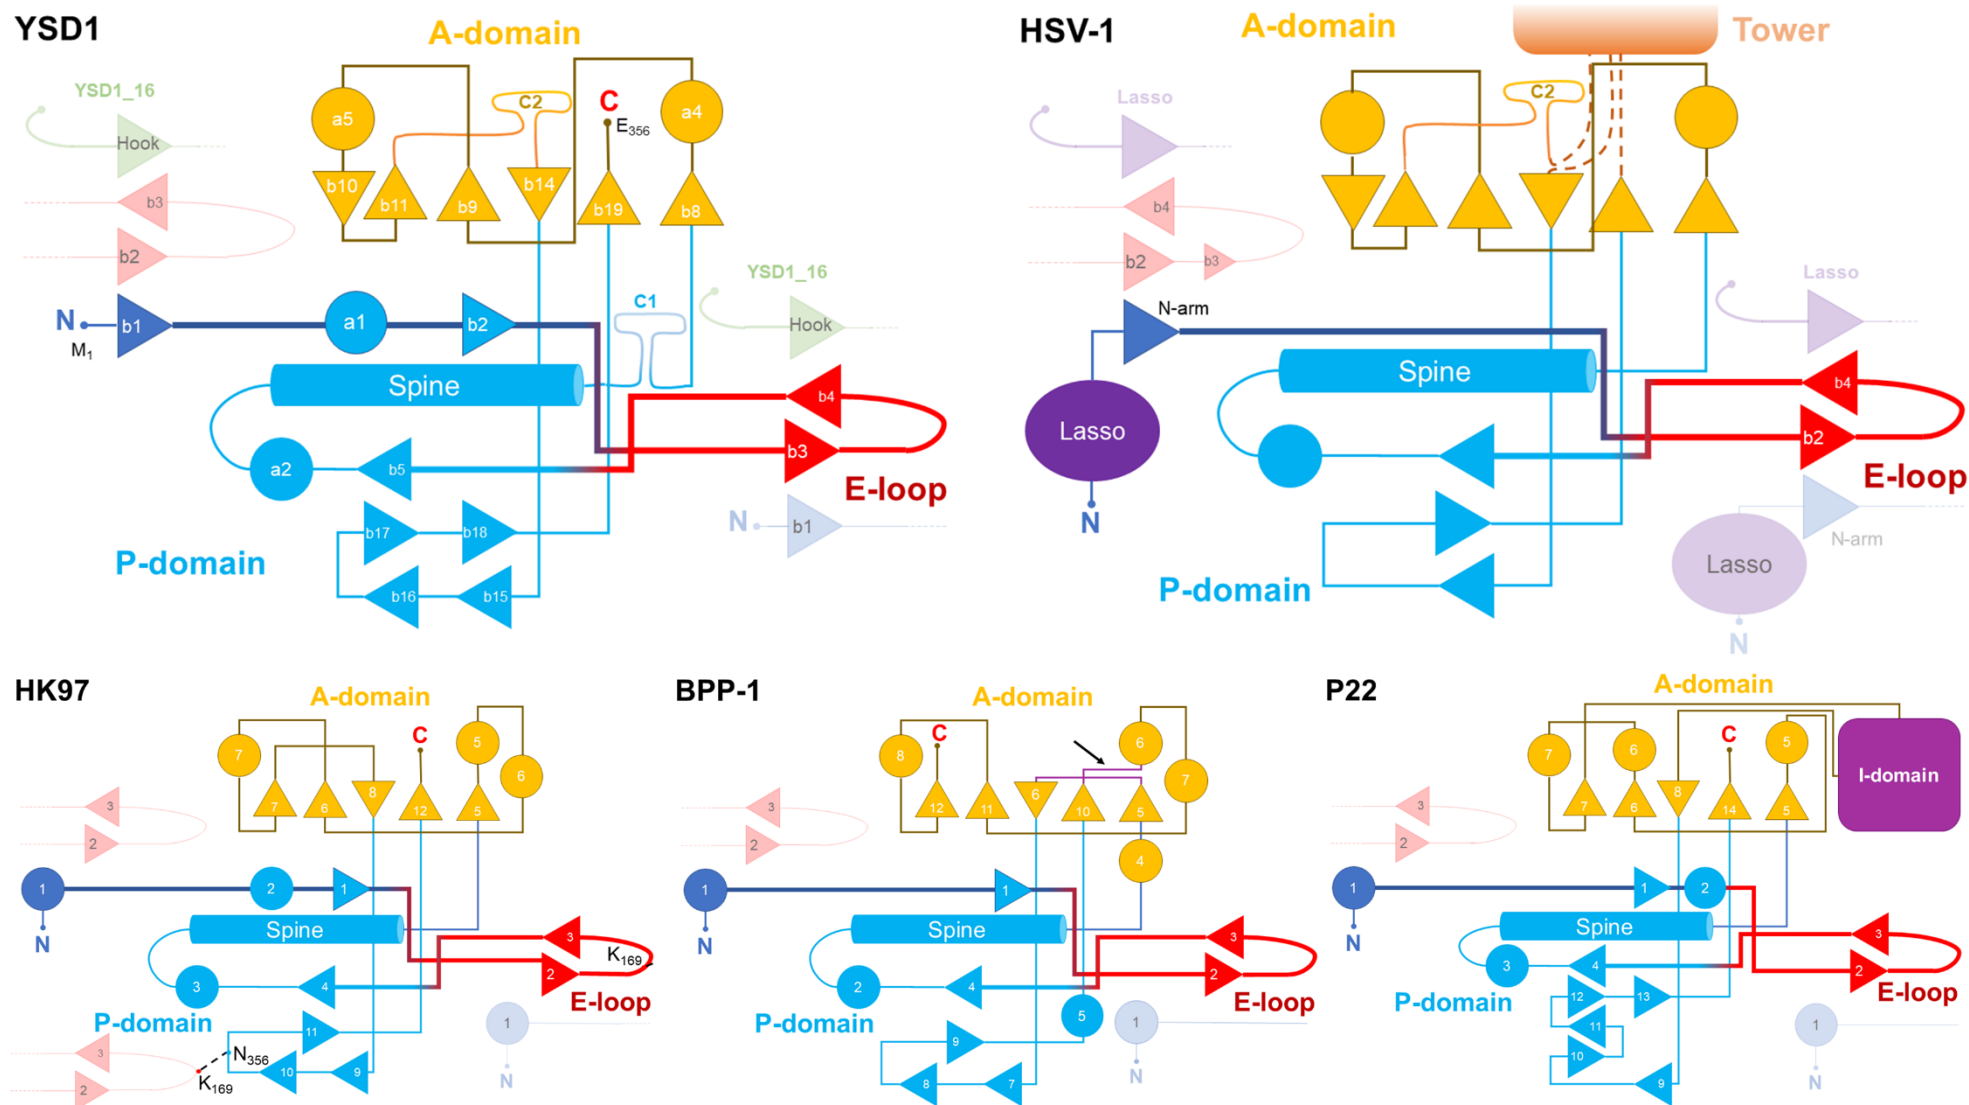

**Supplementary Figure 4.** The topology of the four classes of MCPs represented by the prototypical HK97, P22, BPP-1 and YSD1, and compared to a simplified topology of the HCMV herpesvirus. Augmented  $\beta$ -sheets from inter-molecular  $\beta$ -strands (shaded regions) are only indicated for YSD1 and HCMV with the colour scheme of Figure 2. The isopeptide bonds of HK97 and altered topology of BPP-1 are indicated.

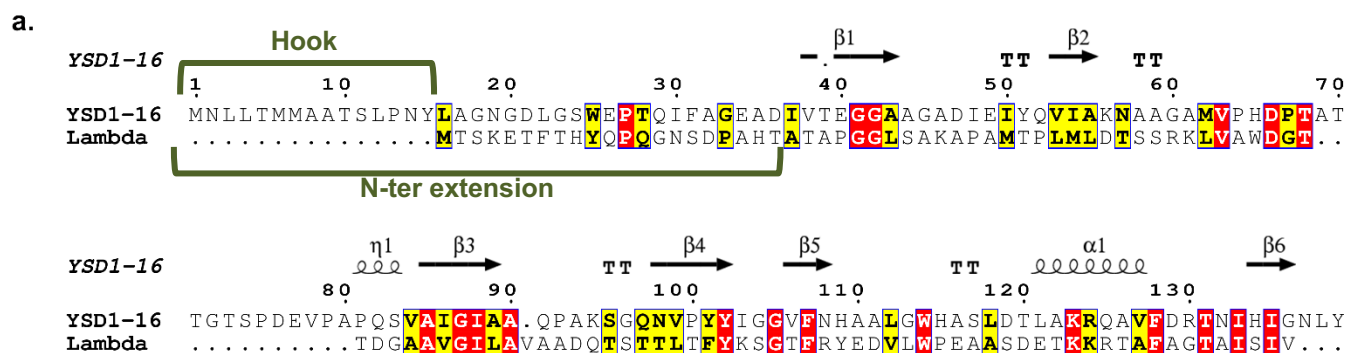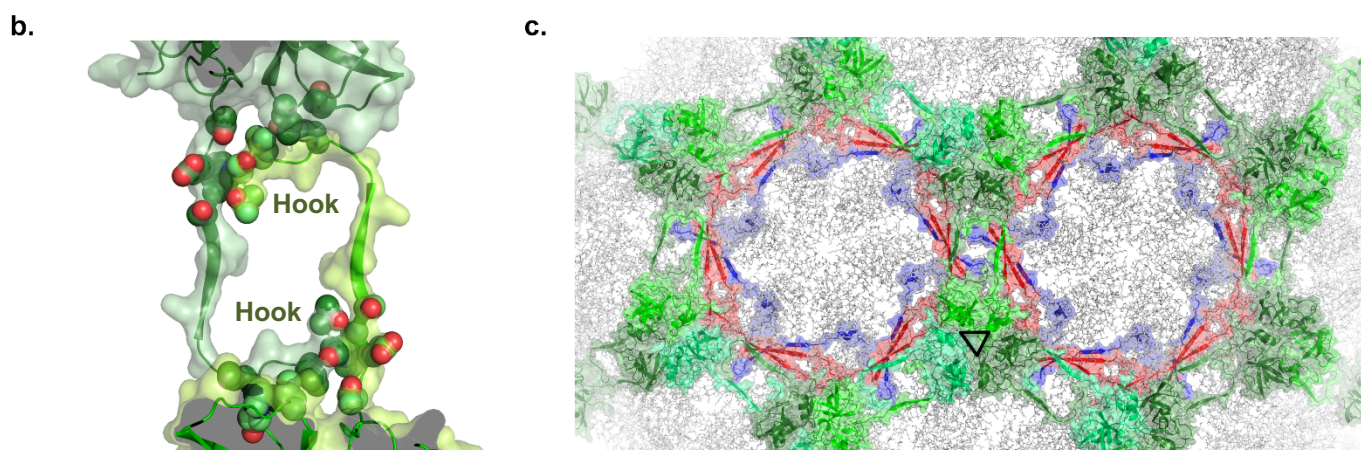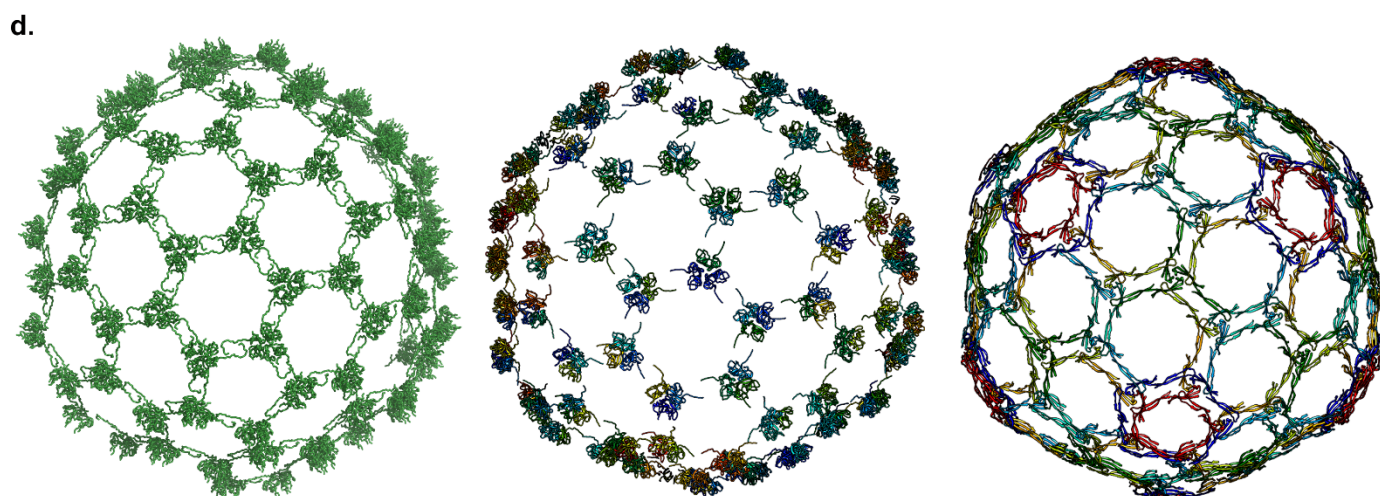

**Supplementary Figure 5: A hook extension in auxiliary protein creates a distinctive outer chainmail in  $\chi$ -like phages but not  $\lambda$ , which provides extra stabilisation.** **a.** Structure-based sequence alignment of the auxiliary protein YSD1\_16 and lambda gpD shows a high sequence conservation (17.4% identity) with an additional N-terminal sequence in YSD1 forming the so-called hook. Sequence alignment was performed using Clustal Omega<sup>7</sup> and displayed using ESPRIPT v3<sup>6</sup>. **b.** Two auxiliary trimers coloured in different shades of green are interconnected through the hook-shaped N-terminal extension. The side chains of interacting residues (inter-molecular distance < 5Å) are represented as spheres and coloured by element: green = carbon, red = oxygen, blue = nitrogen. **c.** Overview of the YSD1 outer chainmail formed by the auxiliary protein (green) and the MCP E-loops (red) and N-termini (blue). Colour scheme and orientation is similar to **Figure 2 b-d**. **d.** Comparison of siphovirus stabilisation networks displayed in a cartoon representation. YSD1 (left) combines two networks of interactions whereas the cementing protein (gpD) of lambda (middle) does not form connections between trimers. HK97 uses a covalent chainmail and no auxiliary protein (right).

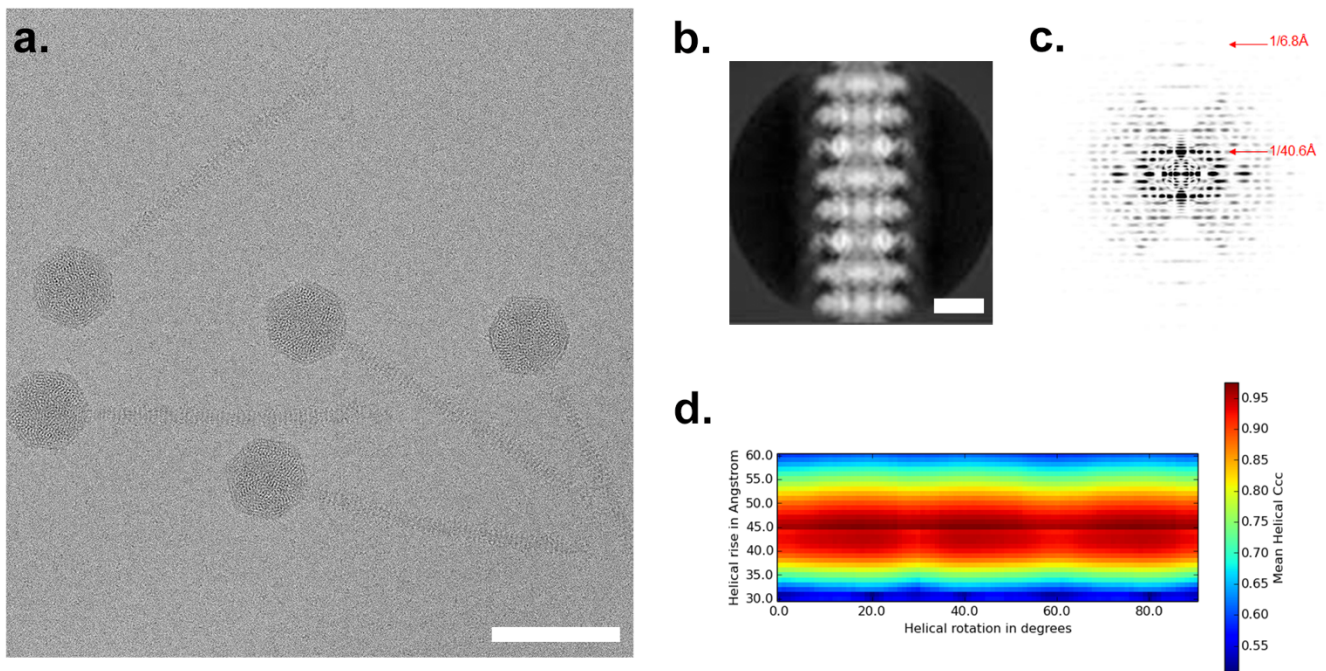

**Supplementary Figure 6. Helical reconstruction of the YSD1 tail-tube.** **a.** Representative cryo-EM micrograph of YSD1 (five imaging sessions). Scale bar = 100 nm. **b.** 2D class average of the YSD1 tail and **c.** the corresponding Fourier transform (inverted contrast). Domain 2 is seen as extensions from the tube and domain 3 is blurred at the edges. Two layer lines are labelled with the distance from the equator: the ( $n=0$ ,  $1/40.6 \text{ \AA}^{-1}$ ) layer line corresponding to the helical rise and the highest resolution layer line visible ( $n=0$ ,  $1/6.8 \text{ \AA}^{-1}$ ). **d.** Real-space search of the helical parameters using `segclassreconstruct.py` from the SPRING suite<sup>8</sup> around the approximate helical rise (30-60 Å) and 0-90° for the helical rotation. The mean cross-correlation of the projection of the reconstruction with the original 2D class is displayed as a heat map. Refinement of the parameters using RELION<sup>9</sup> indicated a helical rise of 40.61 Å and a twist of 19.69°.

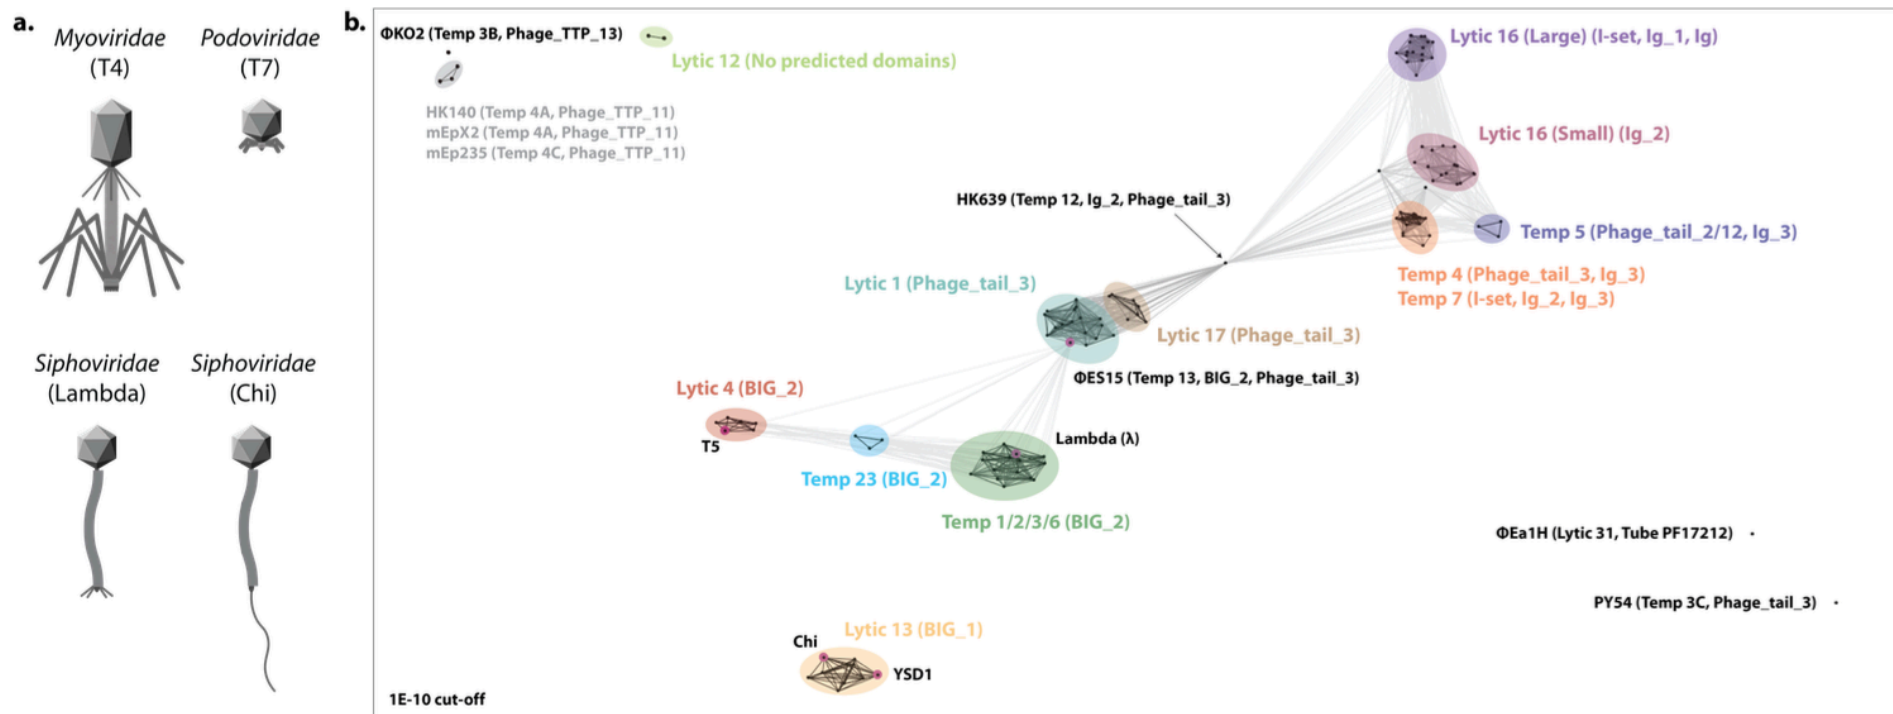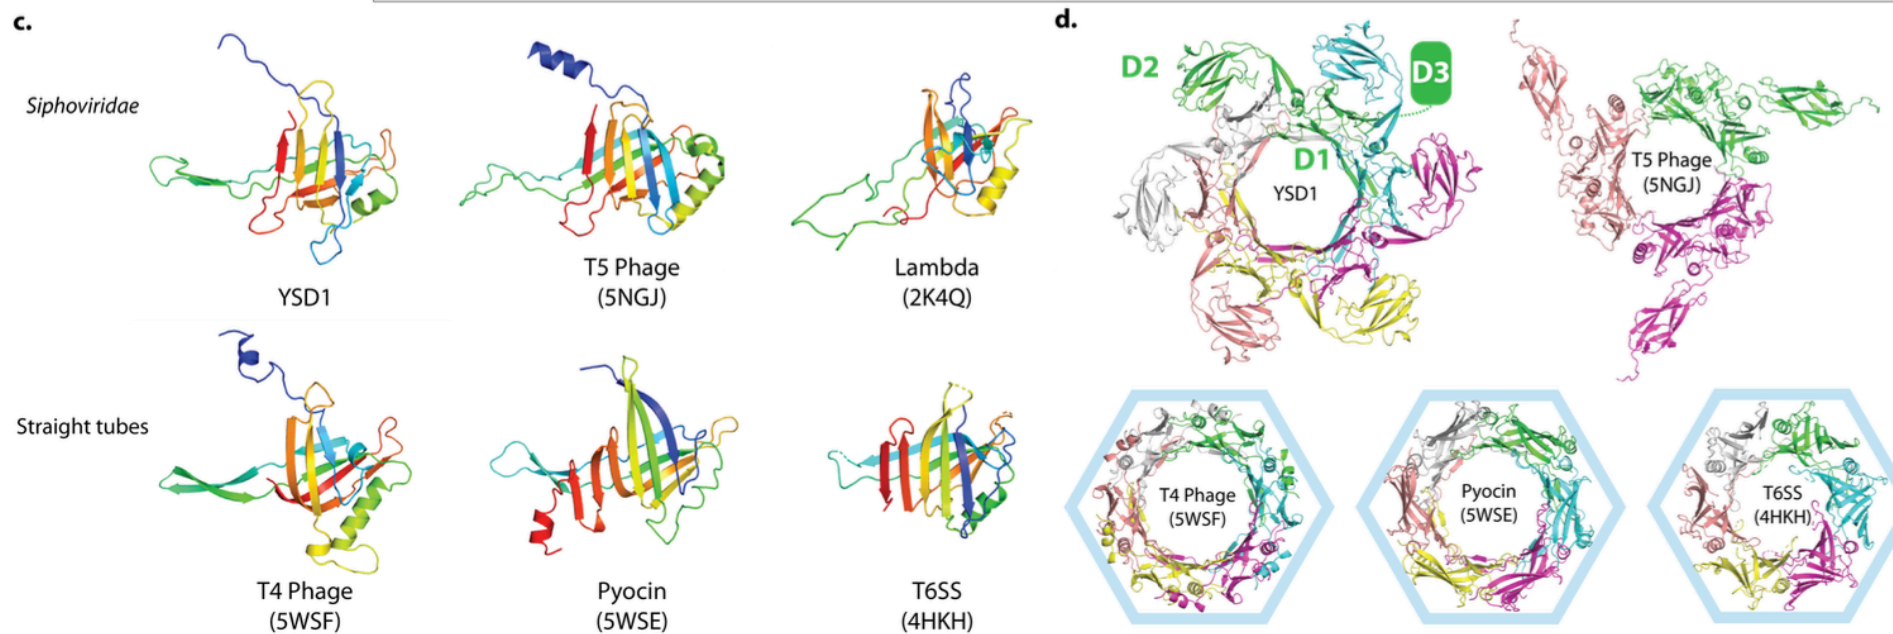



**Supplementary Figure 7. Tail morphology and tail-tube proteins show diversity within the *Siphoviridae*.** **a.** Morphology of myophages (e.g. T4), podophages (e.g. T7) and siphophages (e.g.  $\lambda$  and YSD1). **b.** Sequence-based relationships for TTPs is documented with CLANS<sup>10</sup>, graphically depicting sequence-based homology in large protein sequence datasets. The analysis utilizes all-against-all pairwise BLAST to cluster representations (black dots) of individual protein sequences in three-dimensional space, represented here in two-dimensions. Lines link similar protein sequences, with the connections shown here representing an E-value cut-off of  $1e^{-10}$  of YSD1\_22 mapped on all 20 groups of TTPs. Chi, YSD1, T5 and Lambda sequences (Source Data) are highlighted in pink. CLANS analysis using sequences from which the non-structural domain 3 (Big-1/Big-2) was deleted is similar but most connections between clusters are absent (cf. Data Source). **c.** Despite the considerable sequence-based diversity revealed by CLANS, there are close structure-based relationships for TTPs. Cartoon representation of the tail structure colored in a blue-red rainbow representation from N- to C-terminus for domain 1. Considerable similarity is evident to other TTPs, as well as the tube proteins from bacterial T6SS and pyocin structures (Supplementary Tables 6, 8). **d.** Cartoon representation of the oligomeric unit of the siphovirus tails and other tubes. The outer sheath is represented as a blue hexagon.

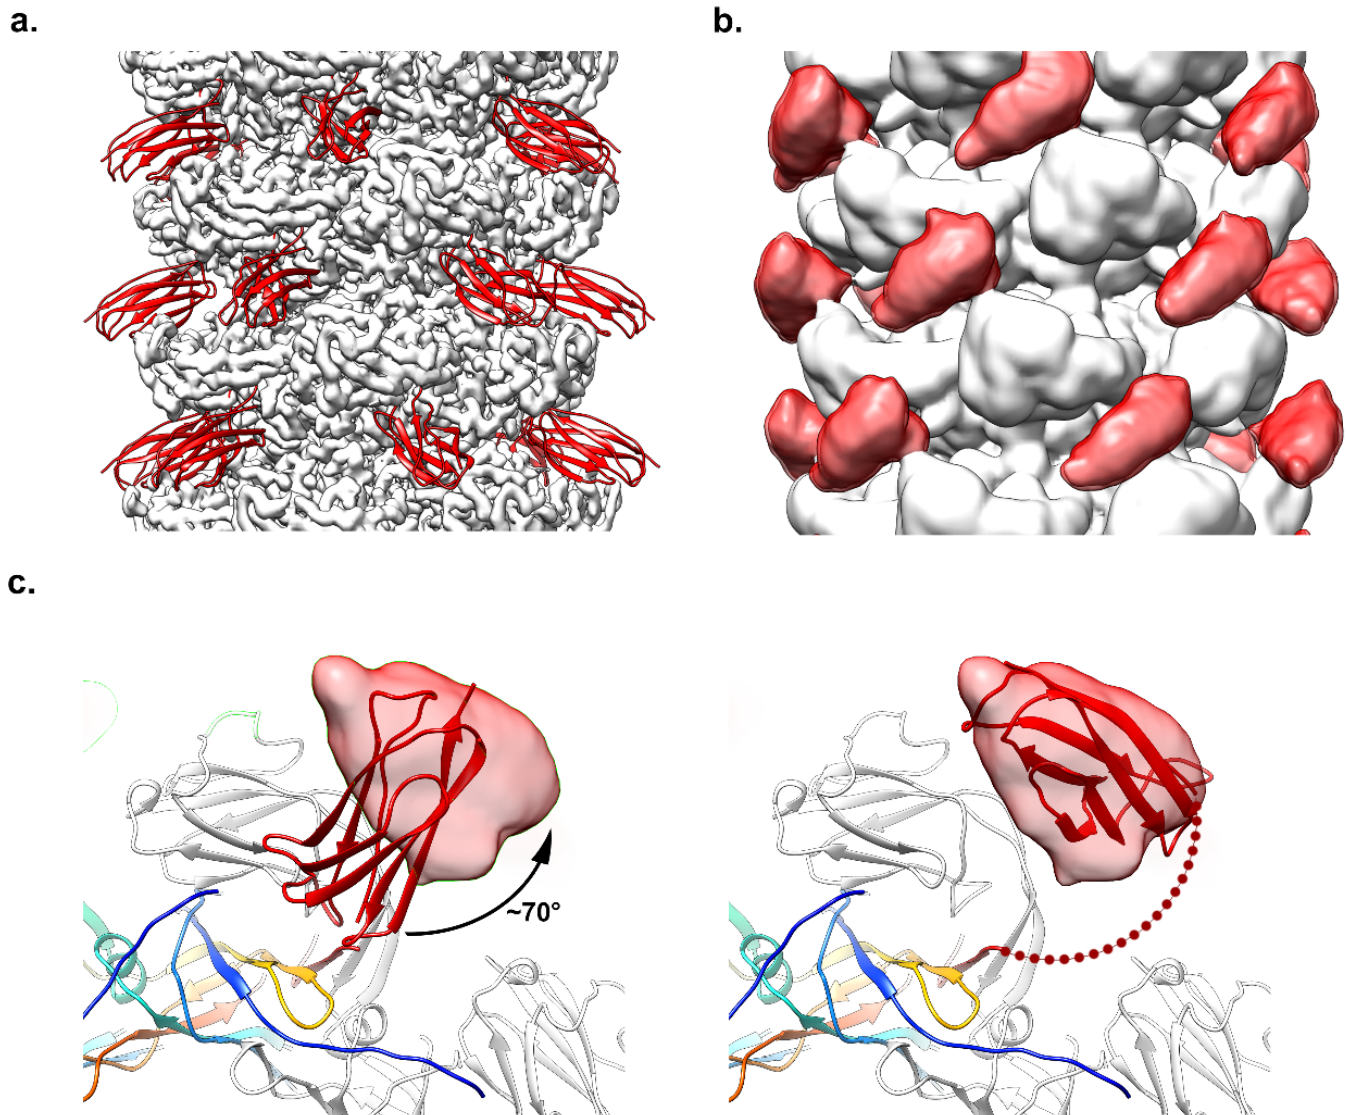

**Supplementary Figure 8. Flexibility of domain 3 of the TTP in the EM reconstruction.** a. Surface representation of the EM map (white) fitted with the YSD1\_22 model atomic model and a model of domain 3 according to its corresponding position in the SAXS envelope (**Figure 4, Supplementary Figure 10**). b. When displayed at a lower threshold a blurred density is seen at the edges of the tube close to the predicted position of domain 3. c. Cartoon representation of domain 1 (rainbow), domain 2 (white), and domain 3 (red). A rotation of  $\sim 70^\circ$  is required for an optimal fit in the extra density. There is a stretch of 11 residues between domains 1 and 3, which may exist as a flexible linker between the two domains.

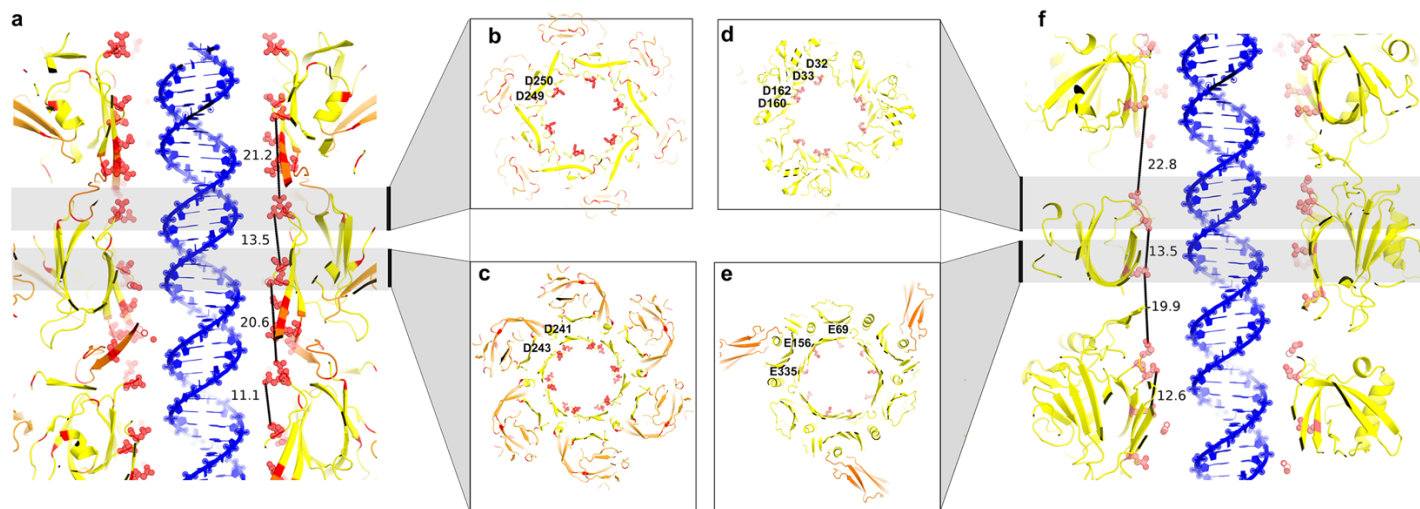

**g**

**>lytic1-17temp12-13**  
 MGMHPLNPGSQIFI**E**SSRGA**E**IAVTAATNAASISDLTKGPVITVADASDGLAKGDYVIVTSSPWSKLLNRLVRLVKTVTTAATTITL**E**GID**T**DTTKFPAGAFVGTGTSVVKISSWT**E**IPCVO**D**VST**D**G**E**Q**Q**F  
 VTYQCLSD**DD****R****E**QQLPTYKSAVVLYTFFAH**E**Y**D**NPYIPLRL**DE**SGAVTAIRMYVPKAASGK**E**MRLWAGTVSFNE**E**IPST**E**VN**E**M**E**TVSLAVTLKGRMSFLAAD**DL****E**ALS**KAD****LD****LD**LPATKSVATGAAL**DLA**  
 VVMKGSAPYTYVWKKGSTAIPGKTASTFNISSVASGDAGVYTC**E**VT**DA**AGKTTISA**ACT**VT**V**S

**>lytic12**  
 MANSVFNCSQVPAADVNATRLSIAKVC**E**PVSGTPWTVQQPNEISSY**SAD**ITKTQRTPIST**DR**SARKGTVTNV**E**VAPGFQ**D**ITL**D**TPRYWG**D**GFLYSKWVGAGAI**D**i**D**VTSV**D**a**D**SYNVATMGAALAGTLVY  
 ATGFTLAANNGLKTVGASSTT**E**IMVTGLAA**E**ASPPA**E**ARLYVVGHVAAAG**DI**AVNGQLTST**TL**DFTTLGLVPGQYIY**ID**GFQSVTSKMARVTT**DD**TTITLSNS**E**FT**E**AGT**D**KTVRLFVSSFRNV**P**V**D**  
 SADFLK**E**Y**T**M**E**ARNTTPV**I**Y**E**ARAVAA**Q**MTINAPL**T**E**K**MT**M**DLTFVA**Q**DL**S**E**P**V**E**TPLPGAGY**S**EFV**A**EAYNTVTLNLRVLT**GI****DE**SGLSTYL**KD**VTVTINN**V**SG**EN**VLGV**M**GAFTN**IG**LE**IT**M  
**D**T**E**VT**M**T**D**GSVLA**A**IRNNATV**N**F**E**LAGV**NG**D**G**AFV**V**NI**P**AMTL**G**DGSK**N**LAT**G**E**K**V**K**V**T**V**S**TA**H****EE****E**TVGYM**I**GFSLFPY**L**PTA

**>lytic13 (Chi-like)**  
 MN**D**NYQNNYVVGRGTVY**DF**Q**D**GN**R**RK**T**G**E**MYFG**N**T**E**FT**I**NT**D**S**E**TL**D**HYSS**D**HGMR**V**MS**D**ASV**L**EAS**Q**GGT**F**T**C**D**N**IN**A**D**N**LAL**W**FL**E**VS**N**TT**Q**T**Q**T**DA**E**V**F**N**P**I**MR**G**RY**Q**L**G**TT**DD**N**P**T**G**VR**G**V  
 TN**F**Q**M**V**K**A**D**AS**I**AI**S**V**G**S**D**IT**S**IV**G**AT**V**V**N**PAG**NY****E**i**D**i**E**AG**R**I**Y****E**P**D**ST**D**LAG**N**VQ**I**AVQ**Y****D**V**D**AQ**K**RTL**V**IG**K**SN**M**VY**G**AL**R**MI**S**D**N**PV**L**GN**K**NY**F**PK**V**S**I**AP**D**g**D**YAL**K**G**DD**WQ**V**MS**F**TF**K**AM**Q**L  
 NNITQRVY**I**D**I**VE**AAA**V**D**P

**>lytic16**  
 MMGF**F**K**V**K**D**VPSRRRVQYARVSGAG**E**GVVY**I**K**DE**SV**L**G**E**PV**DE**MP**F**AD**K**TGLAL**I**AD**G**ILY**E**VPY**L****DD**AG**D**VY**F**DL**Q**PA**D**T**E**L**K**D**G**

**>lytic4**  
 MS**L**Q**L**LR**N**TR**I**FVSTVKTGH**N**KT**N**T**Q****E**IL**V**Q**DD**IS**W**G**D**SN**S**T**D**ITV**N**EAG**P**RT**R**G**S**K**R**FN**D**SL**N**AA**E**WS**F**STY**I**LPY**K****D**K**T**D**G**T**D**T**N**K**Q**IV**P**D**Y**ML**W**HAL**S**SG**K**AIN**L****E**G**D**TGA**H**NN**E**T**N**F**M**V**N**F**K**D**N**AY  
 HE**L**AM**L**HI**Y**IL**T**D**K**AW**S**Y**I**D**S**C**Q**IN**Q**A**E**V**N**V**D**I**ED**IG**R**V**T**W**S**G**N**Q**L**IP**L**DA**AP**F**D**P**D**TV**G**I**DD**E**T**Y**M**T**I**Q**S**Y**I**K**N**KL**T**IL**K**I**K****D**M**D**S**D**KAY**D**IP**T**GG**T**FT**I**NN**N**IT**Y**LP**N**IM**S**R**V**NI**P**IG**S**FT**G**AF  
 EL**T**GS**L**TAY**L**N**D**K**S**L**G**SM**E**LY**K**DL**I**K**T**L**K**V**N**RF**E**IAL**I**L**G****E**Y**DD**E**R**PA**AV**L**V**A**K**A**H**V**N**I**P**T**I****E**T**DD**VL**G**TS**V**E**F**KA**I**P**T****D**i**D**T**G****E**YL**G**F**S**SK**Y**T**K**T**I**AN**L**IAT**G**D**G**ATA**AP**KK

**>temp1-2-3-6**  
 MS**L**PM**K**C**ED**AM**P**TP**N**PLAP**V**KAG**T**TL**W**VY**T**GT**D**AFAN**PL**S**D**V**D**WL**R**LAK**I**K**DL**Q**P**G**E**MT**A****E**S**EDD**TY**L****DD**E**D****AD**WT**AT**T**Q**G**K**S**AG**D**T**S**F**TL**AW**K**P**G**E**SG**Q**D**L**V**AW**F**DE****CD**V**R**AY**K**I**K**Y**P**NG**T**V**D**V  
 FR**G**W**S**SL**G**K**T**IT**A**K**E**V**I**TR**V**K**I**T**N**VGR**PS**LA**EE**SG**T**AV**I**A

**>temp23**  
 MS**N**TH**V**K**N**IK**L**GACK**V**S**F**GG**V**DL**G**Y**T**K**G**V**Q**V**E**VAT**ET**L**K**V**T**D**Q**L**G**Q**T**V**I**EL**V**Q**R**NI**T**IT**AP**LA**ES**V**L**Q**N**M**V**DL**M**P**G**ST**L**S**EDD**NS**V**TT**I**SA**Q**GV**N**L**I**D**V**A**K**EL**V**LT**P**Q**DT****D**Y**V**LT**I**PK**A**AT**AG**N**F**T**M**T  
 Y**Q**S**DD**VR**V**F**S**V**Q**F**S**AY**P****DE**E**G**VL**G**K**M**SG**P**K

**>temp4-7**  
 MK**R**TI**F**R**K**TA**V**T**Q**P**S**FR**S**R**C**N**F**N**R**TH**N**P**R**AG**F**LL**S**GG**R**MS**A**LY**E**K**S**Q**L**T**K**IL**I**SS**A**PA**T**K**ET**M**D**SL**T**FP**G**AG**AT**FL**DL**S**C**T**I**K**E**I**Q**FT**G**G**Q****Q****D**i**D**V**T**TL**C**ST**E****Q****E**N**I**NG**L**P**A**PS**E**IS**L**SG**N**F**Y**NN**E**P  
 A**Q****D**AL**R****D**AY**D**ND**TY**G**F**Q**I**FP**PS**NG**F**K**FL**A**E**VR**Q**HT**W**SS**G**T**N**GV**AA**T**F**SL**R**L**K**G**K**P**V**P**ID**SV**L**K**L**TT**D**

**>temp4a**  
 MS**V**L**T**Q**T**Q**L**FL**V**L**K**G**K**V**S****E**V**E**C**I**T**A**FP**S**PG**S**NP**AD**Q**I****ED**T**C**L**S**E**R**F**D**RS**Y**K**R**L**R**TP**G**T**AS**L**T**LN**AD**PK**N**T**S**H**I**M**L**Y**N**L**S**I**S****DD**E**K****Q****D**LT**F**A**I**G**W**S**D**G**T**AS**P**T**AA**E**NG**AS**G**AV**D**GL**V**LP**D**S**R**T**W**F**V**F**K**Y  
 VS**D**FP**F****D**FA**AN**TV**V**ST**S**AS**I**Q**R**SG**S**AV**V**PK**V**VT**P**

**>temp5**  
 MM**A**C**E**AG**A**FT**G**R**D**VVVV**Y**A**I**GC**P****E**V**Q**PT**S**AY**Q**RL**G**MM**R**G**K**TV**NA****E**W**E**T**A**D**A**T**A**D**M**S**A**FT**Q**EN**L**V**T**Y**K**NI**S**FS**G**D**G**V**T**R**K****ED**V**Y**A**Q**N**L**K**R**H**V**Y**N**PP**A**E**T**S**N**Q**P**Y**V**W**F**K**I**I**S**P**N**D**I**E**G**PF**M**V**T**SW**G****DE****AP**  
**HDD**V**A**T**W**SI**E**ASS**A**G**Q**V**D**VR**D**V**G**AV

**Supplementary Figure 9. Acidic clusters in tail tube proteins related to YSD1\_22.** a-f. Cut-away views of the tail tube of YSD1 (a-c) and T5 (d-f) phages with a double-stranded DNA segment represented at scale within the transit corridor. Acidic residues lining the inner surface of the tail tube are shown as red spheres and labelled. In panels b-e, longitudinal sections of the tail viewed from the phage head highlight the presence of dyads of acidic residues. g. Consensus sequences of the phage clusters defined by CLANS analysis in **Supplementary Figure 7**. Sequences have been truncated to include only the predicted equivalent of D1, and D2 where present. Acidic residues are shown in bold. Stretches of 2 or more acidic residues are colored in red and underlined, and D/ExD/E motifs in magenta where x is any residue.

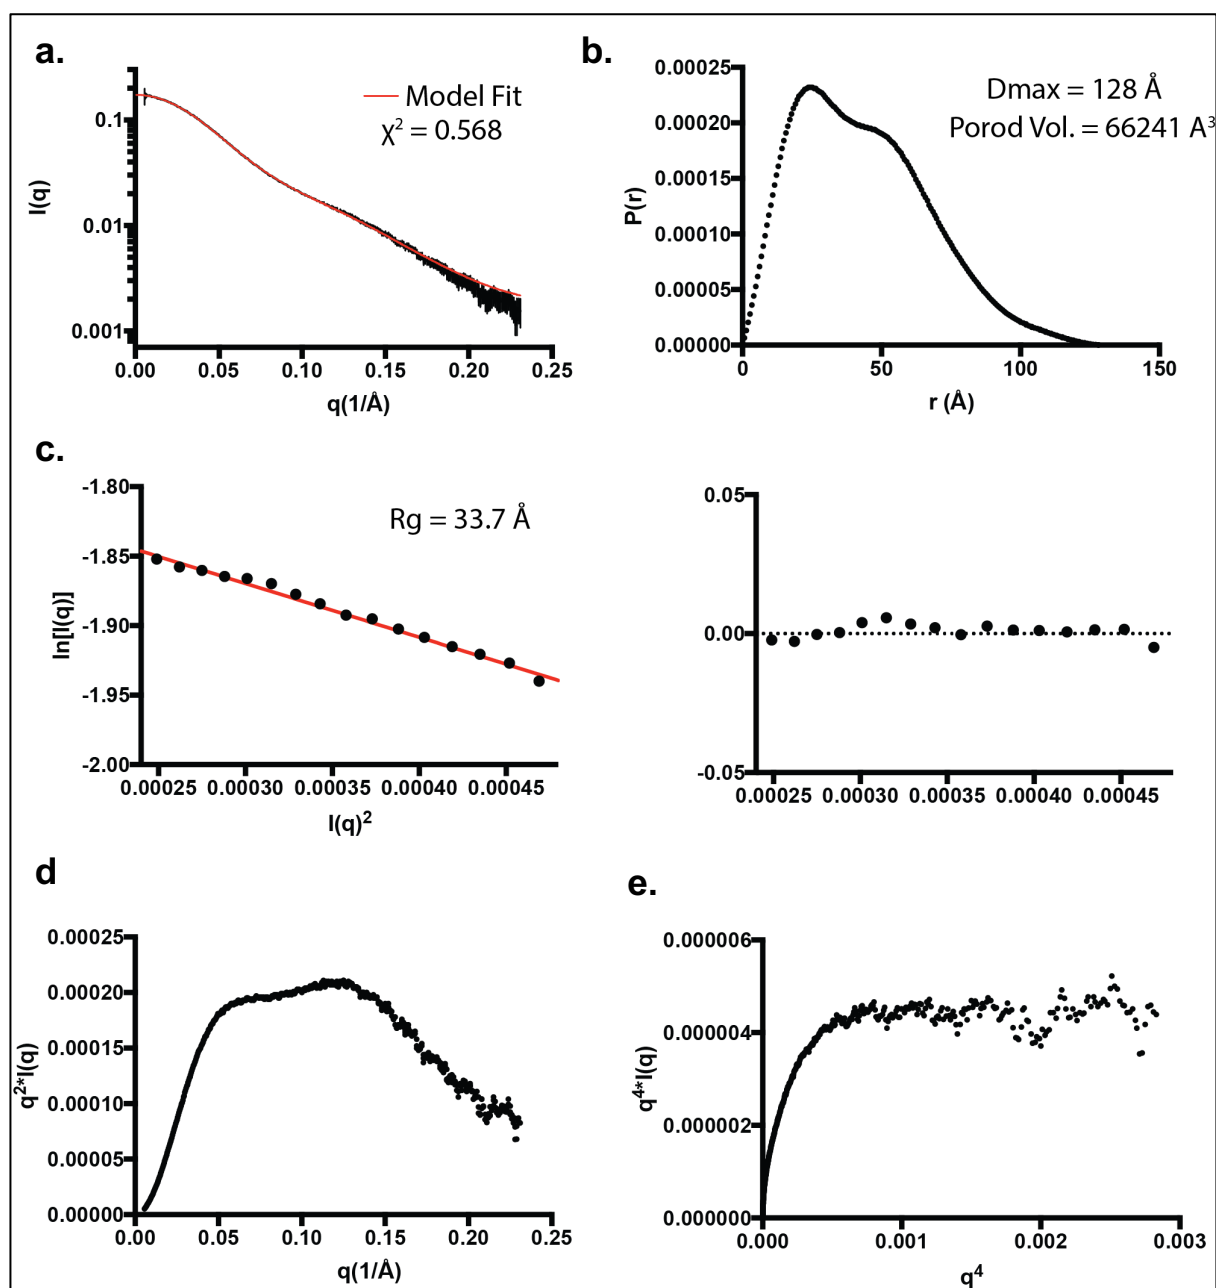

**Supplementary Figure 10. Solution structure of the YSD1\_22 monomer.** **a.** Scattering angle vs. intensity plot for YSD1\_22, the fit for the curve shown in red represents the YSD1\_22 bead model generated with the program DAMMIF. **b.**  $P_r$  distribution showing that YSD1\_22 has a maximum dimension of 128 Å, adopting a compact conformation in solution. **c.** A plot of the Guinier region of YSD1\_22 SAXS showing the particle has a radius of gyration of 33.7 Å. **d.** Kratky plot supporting the multi-domain organisation of YSD1\_22 with some evidence of inter-domain flexibility. **e.** Porod-Debye plot.

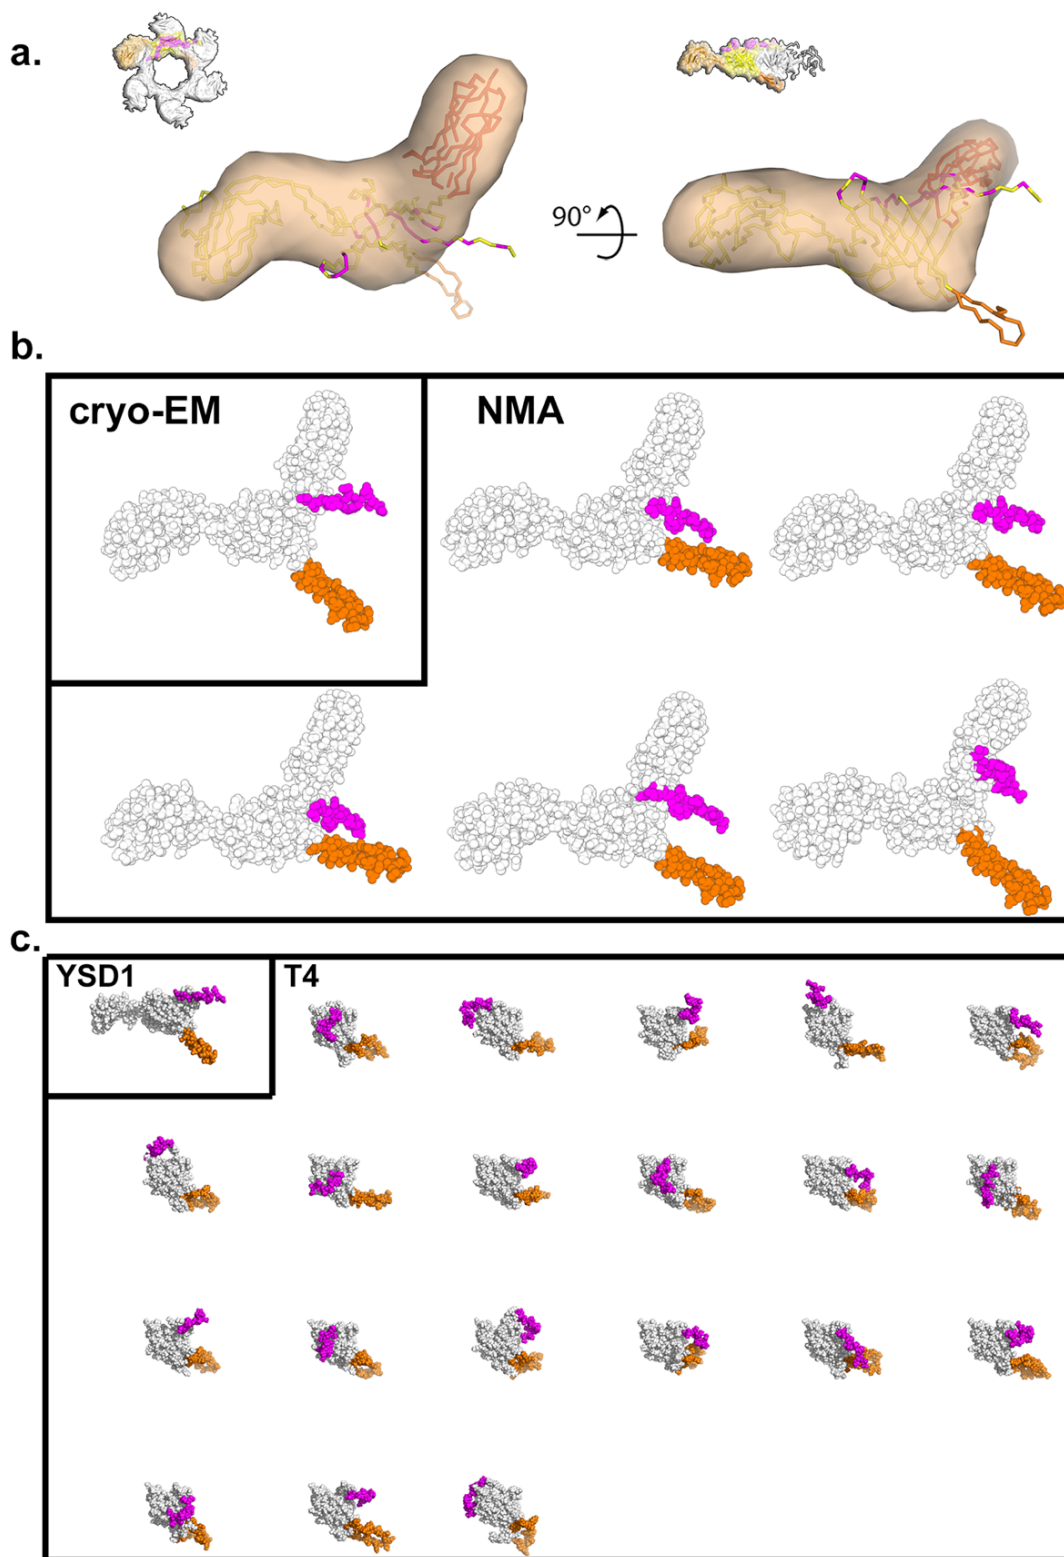

**Supplementary Figure 11. Potential rearrangements in the monomeric form of YSD1\_22.** **a.** Orthogonal views of a molecular envelope of monomeric tail-tube protein derived from SAXS data (Supplementary Table 10). Insets indicate the orientation of each view with regard to the hexameric ring. The tail-tube protein structure from the assembled tail and a homology model for domain 3 are shown for comparison. In the ribbon representation, domains 1, 2 and 3 and the  $\beta$ -hairpin ( $\beta$ -HP) are shown in yellow, brown, cyan and orange, respectively. Residues involved in inter-ring contacts are shown in magenta. **b.** Comparison between the structure of YSD1\_22 in the assembled tail and the top 5 models produced by normal mode analysis (NMA). All NMA models exhibited a comparable fit to the experimental SAXS data as described in Franke, et al.<sup>11</sup> ( $\chi^2 = 0.51-0.56$  vs static model  $\chi^2 = 1.05$ ). **c.** Comparison between the YSD1 tail protein and gpV, its homologue in phage lambda (pdb id 2k4q)<sup>12</sup>. The 20 deposited NMR models are represented with the same colour scheme and orientation as YSD1\_22.

Supplementary Table 1. Cryo-EM data collection and reconstruction parameters

|                                                     | YSD1 Capsid<br>(EMDB-22183)<br>(PDB 6XGQ) | YSD1 Tail<br>(EMDB-<br>22182)<br>(PDB 6XGR) |
|-----------------------------------------------------|-------------------------------------------|---------------------------------------------|
| <b>Data collection and processing</b>               |                                           |                                             |
| Magnification                                       | 105,000                                   | 105,000                                     |
| Voltage (kV)                                        | 300                                       | 300                                         |
| Electron exposure (e <sup>-</sup> /Å <sup>2</sup> ) | 27.24                                     | 27.24                                       |
| Defocus range (μm)                                  | 0.5-2.5                                   | 0.5-2.5                                     |
| Pixel size (Å)                                      | 0.67                                      | 0.67                                        |
| Symmetry imposed                                    | I                                         | C6                                          |
| Initial particle images (no.)                       | 7,366                                     | 184,501                                     |
| Final particle images (no.)                         | 5,449                                     | 147,809                                     |
| Map resolution (Å)                                  | 3.8                                       | 3.5                                         |
| FSC threshold                                       | 0.143                                     | 0.143                                       |
| Map resolution range (Å)                            | 3.8-4.8                                   | 3.5-4.5                                     |
| <b>Refinement</b>                                   |                                           |                                             |
| Initial model used (PDB code)                       | 6XGP                                      | N/A                                         |
| Model resolution (Å)                                | 3.8                                       | 3.5                                         |
| FSC threshold                                       | 0.143                                     | 0.143                                       |
| Map sharpening <i>B</i> factor (Å <sup>2</sup> )    | -134.0                                    | -142.5                                      |
| Model composition                                   |                                           |                                             |
| Non-hydrogen atoms                                  | 25,706                                    | 2,113                                       |
| Protein residues                                    | 3318                                      | 275                                         |
| Ligands                                             | 0                                         | 0                                           |
| <i>B</i> factors (Å <sup>2</sup> )                  |                                           |                                             |
| Protein                                             | 76.3                                      | 71.65                                       |
| Ligand                                              | N/A                                       | N/A                                         |
| R.m.s. deviations                                   |                                           |                                             |
| Bond lengths (Å)                                    | 0.009                                     | 0.004                                       |
| Bond angles (°)                                     | 0.932                                     | 0.668                                       |
| Validation                                          |                                           |                                             |
| MolProbity score                                    | 1.79                                      | 1.41                                        |
| Clashscore                                          | 5.94                                      | 2.92                                        |
| Poor rotamers (%)                                   | 0                                         | 0                                           |
| Ramachandran plot                                   |                                           |                                             |
| Favored (%)                                         | 93.25                                     | 95.2                                        |
| Allowed (%)                                         | 6.75                                      | 4.8                                         |
| Disallowed (%)                                      | 0                                         | 0                                           |

Supplementary Table 2. Crystallography data collection and refinement statistics on YSD1\_17

| YSD1_17<br>(PDB 6XGP)                |                       |
|--------------------------------------|-----------------------|
| Parameter                            |                       |
| Space group                          | P1 2 <sub>1</sub> 1   |
| Asymmetric unit                      | 2 molecules           |
| Cell dimensions                      |                       |
| a, b, c (Å)                          | 54.40, 91.99, 89.03   |
| α, β, γ (°)                          | 90, 102.42, 90        |
| Wavelength                           | 0.9537                |
| Resolution (Å)                       | 46.01-2.6 (2.69-2.60) |
| Completeness (%)                     | 99.6 (99.6)           |
| I/σ<I>                               | 8 (1.4)               |
| CC1/2 (%)                            | 98.3 (54.3)           |
| Redundancy                           | 2.0 (2.0)             |
| R <sub>merge</sub>                   | 0.106 (0.734)         |
| R <sub>meas</sub>                    | 0.149 (1.038)         |
| R <sub>pim</sub>                     | 0.106 (0.734)         |
| Refinement Statistics                |                       |
| Resolution (Å)                       | 30.83-2.6             |
| No. of reflections                   | 26349                 |
| R <sub>work</sub> /R <sub>free</sub> | 0.219/0.258           |
| No. of atoms                         |                       |
| Protein                              | 5208                  |
| Water                                | 46                    |
| Avg B factors                        |                       |
| Protein                              | 44.6                  |
| Water                                | 28.5                  |
| RMSD                                 |                       |
| Bond length (Å)                      | 0.01                  |
| Bond angle (°)                       | 1.80                  |
| Validation                           |                       |
| MolProbity score (percentile)        | 100 <sup>th</sup>     |
| Clashscore                           | 2.82                  |
| Poor rotamers (%)                    | 2.77%                 |
| Ramachandran plot (%)                |                       |
| Favored regions                      | 98.0%                 |
| Allowed regions                      | 1.7%                  |
| Outliers                             | 0.3%                  |

Values in parentheses are for highest resolution shell.

Supplementary Table 3. Structurally related proteins of the YSD1 MCP (mature capsid)

| PDB         | Z-score | RMSD | Alignment length | Number of residues | Sequence id. (%) | Virus     | Family       | MCP class      | Protein                                          |
|-------------|---------|------|------------------|--------------------|------------------|-----------|--------------|----------------|--------------------------------------------------|
| <b>3bqw</b> | 22.1    | 3.6  | 270              | 347                | 22               | -         | -            | -              | Putative capsid protein of prophage              |
| <b>5vf3</b> | 13.7    | 3.6  | 257              | 456                | 6                | T4        | <i>Myo</i>   | P22            | Capsid vertex protein gp24 (isometric capsid)    |
| <b>3bjq</b> | 13.5    | 4.9  | 222              | 293                | 10               | -         | -            | -              | Phage-related protein                            |
| <b>1ohg</b> | 13.3    | 3.5  | 243              | 280                | 6                | HK97      | <i>Sipho</i> | HK97           | MCP (mature empty capsid)                        |
| <b>3j7x</b> | 13.2    | 4    | 262              | 343                | 6                | T7        | <i>Podo</i>  |                | MCP 10A (mature capsid)                          |
| <b>3j7w</b> | 13.2    | 4.2  | 261              | 343                | 7                | T7        | <i>Podo</i>  |                | MCP 10A (early-stage DNA packaging intermediate) |
| <b>5uu5</b> | 13.1    | 3.8  | 254              | 430                | 7                | P22       | <i>Podo</i>  | P22            | MCP (mature capsid)                              |
| <b>5lii</b> | 12.8    | 3.7  | 250              | 433                | 8                | phi812    | <i>Myo</i>   |                | MCP (mature capsid)                              |
| <b>5wk1</b> | 12.1    | 4.8  | 250              | 294                | 6                | TW1       | <i>Sipho</i> |                | MCP (mature capsid)                              |
| <b>5tjt</b> | 11.8    | 4.2  | 245              | 292                | 9                | T5        | <i>Sipho</i> |                | Decoration protein pb10                          |
| <b>2gp1</b> | 11.7    | 4.1  | 215              | 254                | 7                | HK97      | <i>Sipho</i> | HK97           | MCP (Prohead II)                                 |
| <b>3jb5</b> | 10.7    | 4.4  | 248              | 300                | 5                | PA6       | <i>Sipho</i> |                | MCP (procapsid)                                  |
| <b>5l35</b> | 10.5    | 4    | 245              | 422                | 9                | Sf6       | <i>Podo</i>  |                | MCP (mature capsid)                              |
| <b>2e0z</b> | 10.3    | 4.1  | 201              | 228                | 12               | -         | -            |                | PfV                                              |
| <b>3dkt</b> | 10.3    | 6.1  | 205              | 264                | 10               | -         | -            |                | Maritimacin                                      |
| <b>3qpr</b> | 10.2    | 4.4  | 204              | 256                | 6                | HK97      | <i>Sipho</i> | HK97           | MCP (Prohead I)                                  |
| <b>4pt2</b> | 10.1    | 5.3  | 223              | 277                | 9                | -         | -            |                | Encapsulin protein                               |
| <b>6c21</b> | 9.3     | 4    | 221              | 275                | 5                | 80alpha   | <i>Sipho</i> | $\lambda/\chi$ | MCP (mature capsid)                              |
| <b>3j7v</b> | 9.3     | 5.4  | 226              | 296                | 8                | T7        | <i>Podo</i>  |                | MCP 10A (procapsid)                              |
| <b>1yue</b> | 9.3     | 6    | 219              | 390                | 10               | T4        | <i>Myo</i>   | P-22           | Capsid vertex protein gp24 (prolate capsid)      |
| <b>6b0x</b> | 8.7     | 5.7  | 210              | 284                | 6                | 80alpha   | <i>Sipho</i> | $\lambda/\chi$ | MCP (procapsid)                                  |
| <b>2xvr</b> | 8.5     | 3.9  | 215              | 246                | 6                | T7        | <i>Podo</i>  |                | MCP 10A (mature empty capsid)                    |
| <b>3j4u</b> | 6.9     | 3.9  | 181              | 327                | 5                | BPP-1     | <i>Podo</i>  | BPP-1          | MCP (mature capsid)                              |
| <b>3j40</b> | 6.4     | 3.9  | 175              | 335                | 6                | Epsilon15 | <i>Podo</i>  | BPP-1          | MCP gp10 (mature capsid)                         |

Generated using the DALI server<sup>13</sup>. The RMSD is reported for all aligned C $\alpha$  as defined in the “Alignment length” column. Redundant structures have been omitted.



Supplementary Table 4. Structurally related proteins of the YSD1 MCP (monomer).

| PDB         | Z-score | RMSD | Alignment length | Number of residues | Sequence id. (%) | Virus     | Family       | MCP class      | Protein                                          |
|-------------|---------|------|------------------|--------------------|------------------|-----------|--------------|----------------|--------------------------------------------------|
| <b>3bqw</b> | 31.4    | 2.6  | 313              | 347                | 25               | -         | -            | -              | Putative capsid protein of prophage              |
| <b>3bjq</b> | 16      | 3.6  | 242              | 296                | 11               | -         | -            | -              | Phage-related protein                            |
| <b>2gp1</b> | 12.2    | 3.6  | 211              | 254                | 7                | HK97      | <i>Sipho</i> | HK97           | MCP (Prohead II)                                 |
| <b>5vf3</b> | 12      | 4.8  | 220              | 456                | 6                | T4        | <i>Myo</i>   | P22            | Capsid vertex protein gp24 (isometric capsid)    |
| <b>5uu5</b> | 11.7    | 4    | 224              | 430                | 9                | P22       | <i>Podo</i>  | P22            | MCP (mature capsid)                              |
| <b>2e0z</b> | 11.5    | 3.8  | 208              | 228                | 13               | -         | -            | -              | PfV                                              |
| <b>1ohg</b> | 11.5    | 4.1  | 203              | 280                | 7                | HK97      | <i>Sipho</i> | HK97           | MCP (mature empty capsid)                        |
| <b>3j7w</b> | 11.1    | 4.5  | 226              | 343                | 7                | T7        | <i>Podo</i>  |                | MCP 10A (early-stage DNA packaging intermediate) |
| <b>3dkt</b> | 11.1    | 4.7  | 214              | 264                | 10               | -         | -            | -              | Maritimacin                                      |
| <b>4pt2</b> | 11      | 4    | 223              | 277                | 10               | -         | -            | -              | Encapsulin protein                               |
| <b>3j7x</b> | 10.7    | 4.8  | 221              | 343                | 8                | T7        | <i>Podo</i>  |                | MCP 10A (mature capsid)                          |
| <b>3qpr</b> | 10.6    | 4    | 213              | 256                | 7                | HK97      | <i>Sipho</i> | HK97           | MCP (Prohead I)                                  |
| <b>5lii</b> | 10.4    | 3.6  | 207              | 433                | 11               | phi812    | <i>Myo</i>   |                | MCP (mature capsid)                              |
| <b>1yue</b> | 10.2    | 4.8  | 217              | 390                | 9                | T4        | <i>Myo</i>   | P22            | Capsid vertex protein gp24 (prolate capsid)      |
| <b>3j7v</b> | 9.9     | 4.5  | 229              | 298                | 8                | T7        | <i>Podo</i>  |                | MCP 10A (procapsid)                              |
| <b>5wk1</b> | 9.8     | 4.4  | 220              | 294                | 7                | TW1       | <i>Sipho</i> |                | MCP (mature capsid)                              |
| <b>5tjt</b> | 9.2     | 4.9  | 201              | 292                | 9                | T5        | <i>Sipho</i> |                | Decoration protein pb10                          |
| <b>5l35</b> | 9.1     | 4.7  | 201              | 422                | 9                | Sf6       | <i>Sipho</i> |                | MCP (mature capsid)                              |
| <b>3jb5</b> | 8.9     | 4.8  | 207              | 300                | 7                | PA6       | <i>Sipho</i> |                | MCP (procapsid)                                  |
| <b>6b0x</b> | 8.8     | 4.6  | 215              | 284                | 8                | 80alpha   | <i>Sipho</i> | $\lambda/\chi$ | MCP (procapsid)                                  |
| <b>6c21</b> | 8.3     | 4.3  | 190              | 275                | 7                | 80alpha   | <i>Sipho</i> | $\lambda/\chi$ | MCP (mature capsid)                              |
| <b>2xvr</b> | 7.6     | 3.9  | 189              | 246                | 6                | T7        | <i>Podo</i>  |                | MCP 10A (mature empty capsid)                    |
| <b>3j40</b> | 3.8     | 5    | 146              | 335                | 5                | Epsilon15 | <i>Podo</i>  | BPP-1          | MCP gp10 (mature capsid)                         |

Generated using the DALI server<sup>13</sup>. The RMSD is reported for all aligned C $\alpha$  as defined in the “Alignment length” column. Redundant structures have been omitted.

Supplementary Table 5. Structurally related proteins to YSD1\_16

| PDB         | Z-score | RMSD | Alignment length | Number of residues | Sequence id. (%) | Virus  | Protein                   |
|-------------|---------|------|------------------|--------------------|------------------|--------|---------------------------|
| <b>1td4</b> | 12.8    | 1.7  | 95               | 102                | 25               | P21    | SHP                       |
| <b>1c5e</b> | 11.9    | 1.7  | 88               | 95                 | 21               | Lambda | gpD                       |
| <b>6bl5</b> | 6.1     | 2.7  | 86               | 129                | 9                | P74-26 | P87                       |
| <b>5wk1</b> | 5.2     | 3.2  | 85               | 148                | 16               | TW1    | TW1_056                   |
| <b>3suc</b> | 4.8     | 11.4 | 80               | 767                | 10               | phi29  | Preneck appendage protein |

Generated using the DALI server<sup>13</sup>. The RMSD is reported for all aligned C $\alpha$  as defined in the "Alignment length" column. Redundant structures have been omitted.

Supplementary Table 6. Structurally related proteins of the YSD1 TTP domain 1

| PDB         | Z-score | RMSD | Alignment length | Number of residues | Sequence id. (%) | Organism                         | Description          |
|-------------|---------|------|------------------|--------------------|------------------|----------------------------------|----------------------|
| <b>4hkh</b> | 9.9     | 2.9  | 113              | 137                | 5                | <i>Escherichia coli</i>          | Putative T6SS        |
| <b>3he1</b> | 9.8     | 2.7  | 107              | 143                | 7                | <i>Pseudomonas aeruginosa</i>    | T6SS Hcp3 protein    |
| <b>6a2v</b> | 9.5     | 3    | 113              | 148                | 9                | <i>Campylobacter jejuni</i>      | T6SS Hcp1            |
| <b>6bdc</b> | 9.5     | 3.2  | 112              | 123                | 5                | <i>Flavobacterium johnsoniae</i> | T6SS Hcp1            |
| <b>5xeu</b> | 9.1     | 2.7  | 101              | 129                | 12               | <i>Salmonella typhimurium</i>    | T6SS Hcp2            |
| <b>5mxn</b> | 9       | 2.9  | 120              | 170                | 11               | <i>Vibrio cholerae</i>           | Non-contractile T6SS |
| <b>5w5e</b> | 8.6     | 3    | 128              | 167                | 8                | <i>Pseudomonas aeruginosa</i>    | Pyocin FIIR2 protein |
| <b>5ngj</b> | 8.6     | 3.6  | 105              | 432                | 8                | T5 phage                         | pb6 TTP              |
| <b>4ksr</b> | 8.5     | 2.8  | 115              | 521                | 10               | <i>Vibrio cholerae</i>           | T2SS protein E       |
| <b>5w5f</b> | 7.9     | 3.2  | 129              | 163                | 9                | T4 phage                         | gp19 TTP             |

Generated using the DALI server<sup>13</sup>. The RMSD is reported for all aligned C $\alpha$  as defined in the “Alignment length” column. Redundant structures have been omitted.

Supplementary Table 7. PISA analysis of YSD1\_22 in the structural context of the tail-tube

| Interface                                                                  | Buried Surface (Å <sup>2</sup> ) | Free energy ( $\Delta^iG$ kcal/mol) | Hydrogen bonds | Salt bridges |
|----------------------------------------------------------------------------|----------------------------------|-------------------------------------|----------------|--------------|
| <b>Within ring</b>                                                         | 2664.9                           | -19.0                               | 32             | 11           |
| <b>Within ring (domain 1 with n-1)</b>                                     | 1665.9                           | -16.6                               | 19             | 2            |
| <b>Within ring (domain 2 with n-1)</b>                                     | 949.8                            | -3.0                                | 12             | 9            |
| <b>Within ring (domain 2 with n-2)</b>                                     | 124.9                            | 0.4                                 | 1              | 0            |
| <b>Interring</b>                                                           | 876.2                            | -4.8                                | 9              | 4            |
| <b>Inter-ring (without <math>\beta</math>-hairpin)</b>                     | 61.5                             | 0.4                                 | 1              | 0            |
| <b>Inter-ring (without <math>\beta</math>-hairpin, without N-terminus)</b> | 0                                | N/A                                 | 0              | 0            |

Supplementary Table 8. Structurally related proteins of the YSD1 TTP domain 2

| PDB         | Z-score | RMSD | Alignment length | Number of residues | Sequence id. (%) | Organism                            | Description                                     |
|-------------|---------|------|------------------|--------------------|------------------|-------------------------------------|-------------------------------------------------|
| <b>2w38</b> | 6.2     | 5.9  | 82               | 432                | 12               | <i>Pseudomonas aeruginosa</i>       | Sialidase-like protein                          |
| <b>4mbo</b> | 5.5     | 3.8  | 88               | 308                | 15               | <i>Streptococcus agalactiae</i>     | Serine-rich repeat adhesion glycoprotein (SRR1) |
| <b>2zuw</b> | 5       | 4.8  | 85               | 745                | 11               | <i>Bifidobacterium longum</i>       | Lacto-N-biose phosphorylase                     |
| <b>5cfa</b> | 4.8     | 3.3  | 83               | 326                | 10               | <i>Staphylococcus aureus</i>        | Bone sialoprotein-binding protein               |
| <b>3is1</b> | 4.8     | 3.7  | 87               | 393                | 9                | <i>Staphylococcus saprophyticus</i> | Uro-adherence factor A                          |
| <b>4igb</b> | 4.8     | 4    | 78               | 426                | 12               | <i>Streptococcus gordonii</i>       | Adhesin Sgo0707                                 |
| <b>5hx2</b> | 4.8     | 6    | 81               | 647                | 7                | T4 phage                            | T4 baseplate wedge protein gp7                  |
| <b>5jq6</b> | 4.7     | 4    | 93               | 320                | 10               | <i>Staphylococcus aureus</i>        | Clumping factor A                               |
| <b>4zqt</b> | 4.6     | 2.9  | 76               | 889                | 7                | <i>Plasmodium falciparum</i>        | M1 family aminopeptidase                        |
| <b>2y1v</b> | 4.6     | 3.1  | 80               | 604                | 4                | <i>Streptococcus pneumoniae</i>     | Pilus protein                                   |
| <b>1r19</b> | 4.6     | 4    | 78               | 286                | 9                | <i>Staphylococcus epidermidis</i>   | Fibrinogen-binding protein SdrG                 |
| <b>4b60</b> | 4.5     | 3.4  | 84               | 299                | 12               | <i>Staphylococcus aureus</i>        | Fibronectin-binding protein A                   |
| <b>6n38</b> | 4.5     | 4.8  | 82               | 532                | 9                | <i>Escherichia coli</i>             | T6SS Baseplate TssF protein                     |

Generated using the DALI server<sup>13</sup>. The RMSD is reported for all aligned C $\alpha$  as defined in the “Alignment length” column. Redundant structures have been omitted.

Supplementary Table 9. Curated list of *Siphoviridae* genomes used for phylogenetic tree analysis

| Cluster        | Phage Name        | Accession Number |          |
|----------------|-------------------|------------------|----------|
| <b>Lytic1</b>  | T1                | AY216660         |          |
|                | Shfl1             | NC_015456        |          |
|                | ADB-2             | JX912252         |          |
|                | Rogue1            | JQ182736         |          |
|                | JK06              | DQ121662         |          |
|                | ΦJLA23            | KC333879         |          |
|                | ΦKP26             | KC579452         |          |
|                | ΦEB49             | JF770475         |          |
|                | ACG-M12           | NC_019404        |          |
|                | F20               | JN672684         |          |
|                | TLS               | AY308796         |          |
|                | ESP2949           | JF912400         |          |
|                | pSf-1             | KC710998         |          |
|                | <b>Lytic4</b>     | T5               | AY543070 |
|                |                   | EPS7             | CP000917 |
| SPC35          |                   | HQ406778         |          |
| AKFV33         |                   | NC_017969        |          |
| ΦR201          |                   | HE956708         |          |
| My1            |                   | JX195166         |          |
| <b>Lytic12</b> | 9NA               | KJ802832         |          |
|                | FSL_SP-062        | KC139632         |          |
|                | FSL_SP-069        | KC139649         |          |
| <b>Lytic13</b> | Chi               | JX094499         |          |
|                | FSL_SP-030        | KC139519         |          |
|                | FSL_SP-039        | KC139514         |          |
|                | FSL_SP-088        | KC139512         |          |
|                | FSL_SP-124        | KC139515         |          |
|                | iEPS5             | KC677662         |          |
|                | SPN19             | JN871591         |          |
|                | Enc34             | JQ340774         |          |
|                | RedJac            | NC_018832        |          |
|                | YSD1              | LR026998         |          |
| <b>Lytic16</b> | SETP3             | EF177456         |          |
|                | AG11              | JX297445         |          |
|                | SETP7             | KF562865         |          |
|                | SETP13            | KF562864         |          |
|                | Ent1              | HE775250         |          |
|                | SE2               | JQ007353         |          |
|                | SSe3 (KS7)        | AY730274         |          |
|                | wskI3             | JX202565         |          |
|                | FSL_SP-101        | KC139511         |          |
|                | Jersey            | KF148055         |          |
|                | K1-dep(4) / (K1G) | GU196277         |          |
|                | K1-dep(1) / (K1H) | GU196278         |          |
|                | K1-ind(1)         | GU196279         |          |
|                | K1-ind(2)         | GU196280         |          |
|                | K1-ind(3)         | GU196281         |          |
|                | FSL_SP-031        | KC139518         |          |
|                | Eta               | KC460990         |          |
| <b>Lytic17</b> | SO-1              | GQ502199         |          |
|                | EP23              | JN984867         |          |
|                | EEP (SSL-2009a)   | FJ750948         |          |
|                | HK578             | JQ086375         |          |
|                | JL1               | JX865427         |          |
|                | eiAU              | KF772233         |          |
|                | eiAU-183          | KF772234         |          |
|                | <b>Lytic26</b>    | E1               | AM491472 |
| <b>Lytic31</b> | ΦEaH1             | KF623294         |          |
| <b>Lytic32</b> | 9g                | KJ419279         |          |

**SUPPLEMENT**

|               |            |           |
|---------------|------------|-----------|
| <b>Temp1</b>  | Lambda     | J02459    |
|               | HK630      | JQ086376  |
|               | HK629      | JQ182735  |
| <b>Temp2</b>  | Φ80        | JX871397  |
|               | HK225      | JQ086371  |
|               | mEp237     | JQ182730  |
| <b>Temp3</b>  | N15        | AF064539  |
|               | PY54       | AJ564013  |
|               | ΦKO2       | AY374448  |
| <b>Temp4</b>  | HK97       | AF069529  |
|               | HK022      | AF069308  |
|               | HK75       | HM173637  |
|               | HK106      | JQ086369  |
|               | HK140      | JQ086370  |
|               | HK446      | JQ086372  |
|               | HK542      | JQ086373  |
|               | HK544      | JQ086374  |
|               | HK633      | JQ086377  |
|               | mEpX1      | JQ182727  |
|               | mEpX2      | JQ182726  |
|               | mEp234     | JQ182732  |
|               | mEp235     | JQ182731  |
|               | mEp390     | JQ182729  |
|               | ENT39118   | HQ201307  |
| <b>Temp5</b>  | ES18       | AY736146  |
|               | Oslo       | NC_018279 |
|               | SPN3UB     | JQ288021  |
| <b>Temp6</b>  | gifsy-2    | NC_010393 |
|               | gifsy-1    | NC_010392 |
|               | Fels-1     | NC_010391 |
|               | mEp043     | JQ182734  |
|               | mEp213     | JQ182733  |
|               | CP-1639    | AJ304858  |
|               | CTD-IΦ     | AB285204  |
|               | mEp460     | JQ182728  |
|               | FSL_SP-016 | KC139516  |
| <b>Temp7</b>  | BP-4795    | AJ556162  |
|               | 2851       | FM180578  |
|               | Stx2-1717  | NC_011357 |
|               | YYZ-2008   | NC_011356 |
| <b>Temp12</b> | HK639      | NC_016158 |
| <b>Temp13</b> | ΦES15      | JQ780327  |
| <b>Temp23</b> | SSU5       | JQ965645  |

Supplementary Table 10. SAXS data collection and analysis

| YSD1_22                                                                         |                                                                            |
|---------------------------------------------------------------------------------|----------------------------------------------------------------------------|
| <b>Sample Parameters</b>                                                        |                                                                            |
| Organism                                                                        | YSD1 phage                                                                 |
| Source                                                                          | <i>E. coli</i> (recombinant expression)                                    |
| Genbank sequence ID (residues in construct)                                     | EDG6582788 (1-381)                                                         |
| Extinction coefficient [A <sub>280</sub> , 0.1%(w/v)]                           | 0.829                                                                      |
| M from chemical composition (Da)                                                | 41430                                                                      |
| <b>SEC–SAXS column, 5 150 mm Superdex S200</b>                                  |                                                                            |
| Loading concentration (mg.ml <sup>-1</sup> )                                    | 10.0                                                                       |
| Injection volume (μl)                                                           | 50                                                                         |
| Flow rate (ml.min <sup>-1</sup> )                                               | 0.4                                                                        |
| Solvent (solvent blanks taken from SEC flowthrough prior to elution of protein) | 50 mM Tris, 100 mM NaCl, 5% Glycerol, 0.1% NaN <sub>3</sub> pH 7.9         |
| <b>Data-collection parameters</b>                                               |                                                                            |
| Instrument                                                                      | Australian Synchrotron SAXS/WAXS beamline with Dectris PILATUS 1M detector |
| Wavelength (Å)                                                                  | 1.0322                                                                     |
| Beam size (μm)                                                                  | 250 × 130                                                                  |
| Camera length (m)                                                               | 2.683                                                                      |
| q range (Å <sup>-1</sup> )                                                      | 0.00663-0.3104                                                             |
| Sample configuration                                                            | Sample configuration SEC–SAXS with sheath-flow cell mm                     |
| Temperature (K)                                                                 | 295                                                                        |
| <b>Structural Parameters</b>                                                    |                                                                            |
| <b>Guinier Analysis</b>                                                         |                                                                            |
| I(0) (cm <sup>-1</sup> )                                                        | 0.17 +/-0.00038                                                            |
| R <sub>g</sub> (Å)                                                              | 33.90 +/-0.12                                                              |
| Coefficient of correlation, R <sup>2</sup>                                      | 1.00                                                                       |
| <b>P(r) Analysis</b>                                                            |                                                                            |
| I(0) (cm <sup>-1</sup> )                                                        | 0.17 +/-0.00036                                                            |
| R <sub>g</sub> (Å)                                                              | 33.93 +/-0.07                                                              |
| D <sub>max</sub> (Å)                                                            | 103.48                                                                     |
| q range (Å <sup>-1</sup> )                                                      | 0.007-0.241                                                                |
| χ <sup>2</sup> (total estimate from GNOM)                                       | 0.777 (0.82)                                                               |
| Porod volume estimate (Å <sup>3</sup> )                                         | 53516                                                                      |
| Dry volume calculated from sequence (Å <sup>3</sup> )                           | 48843                                                                      |
| <b>Molecular-mass determination</b>                                             |                                                                            |
| Molecular mass (M) [from Bayesian Inference] (Da)                               | 44700                                                                      |
| Calculated monomeric M from sequence (Da)                                       | 41430                                                                      |
| Ratio M calculated to expected                                                  | 1.08                                                                       |



|                                                                       |                                                            |
|-----------------------------------------------------------------------|------------------------------------------------------------|
| <b>Shape Model Fitting Results</b>                                    |                                                            |
| <b>DAMMIF</b>                                                         |                                                            |
| q range ( $\text{\AA}^{-1}$ ) for fitting                             | 0.007-0.241                                                |
| Symmetry, anisotropy assumptions                                      | P1, none                                                   |
| $\chi^2$ range                                                        | 0.52-63                                                    |
| Constant adjustment to intensities                                    | Skipped, unable to determine                               |
| <i>M</i> estimate as 0.5 volume of models (Da)<br>(ratio to expected) | 37941 (0.78)                                               |
| <b>Atomistic Modelling</b>                                            |                                                            |
| <b>CRY SOL/SREFLEX</b>                                                |                                                            |
| Atomic Model                                                          | YSD1_22 Cryo-EM structure + Domain 3 model<br>(this study) |
| q range ( $\text{\AA}^{-1}$ ) for all modelling                       | 0.007-0.241                                                |
| <b>Constant subtraction allowed</b>                                   |                                                            |
| $\chi^2$ , P-value                                                    | 1.05, 0.01                                                 |
| Predicted $R_g$ ( $\text{\AA}$ )                                      | 34.20                                                      |
| Vol ( $\text{\AA}^3$ ), Ra ( $\text{\AA}$ ), Dro ( $e\text{\AA}^3$ )  | 44154, 1.44, 0.003                                         |
| Top Normal Modes Explored                                             | 16.0                                                       |
| $\chi^2$ Range for NMA models                                         | 0.51-0.56                                                  |
| <b>Software Employed</b>                                              |                                                            |
| SAXS data reduction                                                   | $I(q)$ versus $q$ using ScatterBrain 2.82                  |
| Extinction coefficient estimate                                       | ProtParam                                                  |
| Basic analyses: Guinier, $P(r)$ , $V_p$                               | PRIMUSqt from ATSAS 2.8.1                                  |
| Shape/bead modelling                                                  | DAMMIF from PRIMUSqt in ATSAS 2.8.1                        |
| Atomic structure modelling                                            | CRY SOL/SREFLEX from PRIMUSqt in ATSAS<br>2.8.1            |
| SASBDB IDs for data and model                                         | SAS2352                                                    |

## Supplementary References

- 1 Berg, H. C. & Anderson, R. A. Bacteria swim by rotating their flagellar filaments. *Nature* **245**, 380-382, doi:10.1038/245380a0 (1973).
- 2 Katsamba, P. & Lauga, E. Hydrodynamics of bacteriophage migration along bacterial flagella. *Physical Review Fluids* **4**, doi:10.1103/PhysRevFluids.4.013101 (2019).
- 3 Grose, J. H. & Casjens, S. R. Understanding the enormous diversity of bacteriophages: The tailed phages that infect the bacterial family Enterobacteriaceae. *Virology* **468-470**, 421-443, doi:10.1016/j.virol.2014.08.024 (2014).
- 4 Pettersen, E. F. *et al.* UCSF Chimera--a visualization system for exploratory research and analysis. *J. Comput. Chem.* **25**, 1605-1612, doi:10.1002/jcc.20084 (2004).
- 5 Notredame, C., Higgins, D. G. & Heringa, J. T-Coffee: A novel method for fast and accurate multiple sequence alignment. *J. Mol. Biol.* **302**, 205-217, doi:10.1006/jmbi.2000.4042 (2000).
- 6 Robert, X. & Gouet, P. Deciphering key features in protein structures with the new ENDscript server. *Nucleic Acids Res.* **42**, W320-324, doi:10.1093/nar/gku316 (2014).
- 7 Sievers, F. & Higgins, D. G. Clustal Omega for making accurate alignments of many protein sequences. *Protein science : a publication of the Protein Society* **27**, 135-145, doi:10.1002/pro.3290 (2018).
- 8 Desfosses, A., Ciuffa, R., Gutsche, I. & Sachse, C. SPRING - an image processing package for single-particle based helical reconstruction from electron cryomicrographs. *J. Struct. Biol.* **185**, 15-26, doi:10.1016/j.jsb.2013.11.003 (2014).
- 9 He, S. & Scheres, S. H. W. Helical reconstruction in RELION. *J. Struct. Biol.* **198**, 163-176, doi:10.1016/j.jsb.2017.02.003 (2017).
- 10 Frickey, T. & Lupas, A. CLANS: a Java application for visualizing protein families based on pairwise similarity. *Bioinformatics* **20**, 3702-3704, doi:10.1093/bioinformatics/bth444 (2004).
- 11 Franke, D. *et al.* ATSAS 2.8: a comprehensive data analysis suite for small-angle scattering from macromolecular solutions. *J Appl Crystallogr* **50**, 1212-1225, doi:10.1107/S1600576717007786 (2017).
- 12 Pell, L. G., Kanelis, V., Donaldson, L. W., Howell, P. L. & Davidson, A. R. The phage lambda major tail protein structure reveals a common evolution for long-tailed phages and the type VI bacterial secretion system. *Proc. Natl. Acad. Sci. U. S. A.* **106**, 4160-4165, doi:10.1073/pnas.0900044106 (2009).
- 13 Holm, L. & Laakso, L. M. Dali server update. *Nucleic Acids Res.* **44**, W351-355, doi:10.1093/nar/gkw357 (2016).
